# Supplementary material
Source: publisher figshare collection journal article supplement (https://acs.figshare.com/ndownloader/files/9577843)
Supplement: Supplementary file 1 [file 9577843]

## SUPPORTING INFORMATION

### Title: Click Chemistry-Mediated Synthesis of Selective Melanocortin

### Receptor-4 Agonists

**Authors:** Daniel Palmer<sup>1\*</sup>, Juliana P L Gonçalves<sup>1</sup>, Louise Valentin Hansen<sup>1</sup>, Boqian Wu,<sup>2</sup>,  
Helle Hald<sup>1</sup>, Sanne Schoffelen<sup>1</sup>, Frederik Diness<sup>1</sup>, Sebastian T Le Quement<sup>3</sup>, Thomas E  
Nielsen<sup>4,5</sup> and Morten Meldal<sup>1\*</sup>

#### Contents of Supporting Information:

| Page    | Contents                                                                                                                                                                                    |
|---------|---------------------------------------------------------------------------------------------------------------------------------------------------------------------------------------------|
| S2      | a phylogenetic relationship between human peptide and melanocortin receptors                                                                                                                |
| S3      | an alignment of the human MC4R and $\beta$ 2-adrenergic receptor                                                                                                                            |
| S4-S6   | images depicting both the basis of the molecular model of compound <b>1</b> complexed with an activated MC4R with an emphasis on the molecular contacts between the ligand and the receptor |
| S7      | a table listing the predicted amino acid residues interacting with compound <b>1</b>                                                                                                        |
| S8-S9   | a generic synthetic reaction scheme and the structures of all candidate ligands                                                                                                             |
| S10-S18 | the mass spectra all compounds confirming both the molecular identity and their relative purity                                                                                             |
| S19-S26 | all data pertaining to the generation of the solvent structure of compound <b>1</b> using NMR-based methods                                                                                 |
| S27-S29 | CRE Reporter Assay; Schematic representation as well as representative data in the form of images and concentration-response curves                                                         |
| S30     | a schematic summary of aspects of cAMP signaling downstream of GPCRs that can be modulated to explain time and agonist-receptor specific outcomes                                           |



**Table S1.** The alignment of the transmembrane domains of MC4R and  $\beta$ 2-Adrenergic receptor.

| Domain | Receptor             | Alignment of domain <sup>a</sup> |
|--------|----------------------|----------------------------------|
| TM1:   | MC4R                 | LFVSPEVFVTLGVISLLENILVIVAI       |
|        | $\beta$ 2-Adrenergic | VVGMGIVMSLIVLAIVFGNVLVITAI       |
| TM2:   | MC4R                 | FICSLAVADMLVSVSNGSETIVITL        |
|        | $\beta$ 2-Adrenergic | FITSLACADLMGLAVVPFGAAHIL         |
| TM3:   | MC4R                 | VIDSVICSSLLASICSLLSIAV           |
|        | $\beta$ 2-Adrenergic | FWTSIDVLCVTASIELTLCVIAV          |
| TM4:   | MC4R                 | GIIISCIWAAC TVSGILFII            |
|        | $\beta$ 2-Adrenergic | RVIIIMVWIVSGLTSFLPIQ             |
| TM5:   | MC4R                 | AVIICLITMFFTMLALMASLYV           |
|        | $\beta$ 2-Adrenergic | YAIASSIVSFYVPLVIMVFVYS           |
| TM6:   | MC4R                 | LTILIGVFVVCWAPFFLHLIFYIS         |
|        | $\beta$ 2-Adrenergic | LGIIMGTFTLCWLPFFIVNIVHVI         |
| TM7:   | MC4R                 | SHFNLYLILIMCNSIIDPLIYAL          |
|        | $\beta$ 2-Adrenergic | EVYILLNWIGYVNSGFNPLIYCR          |

<sup>a</sup>The alignment provides the best helical register fit considering identical residues, conservative substitutions, structural residues small amino acids and hydrophobicity.

a

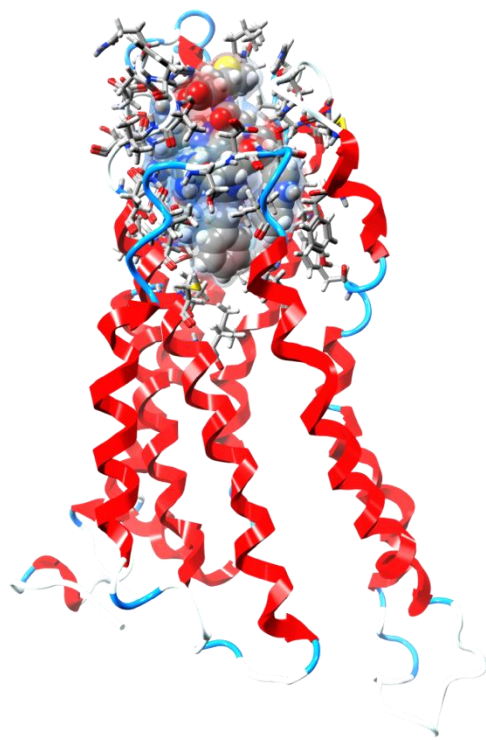

b

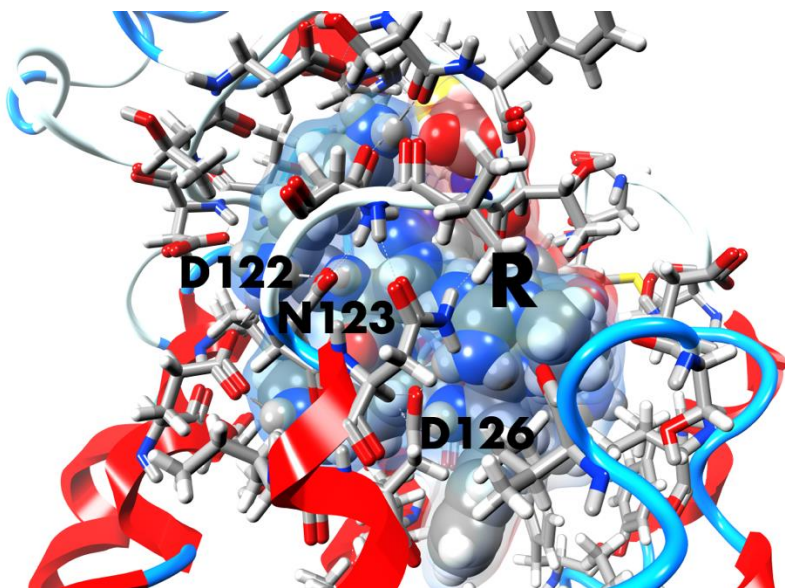

c

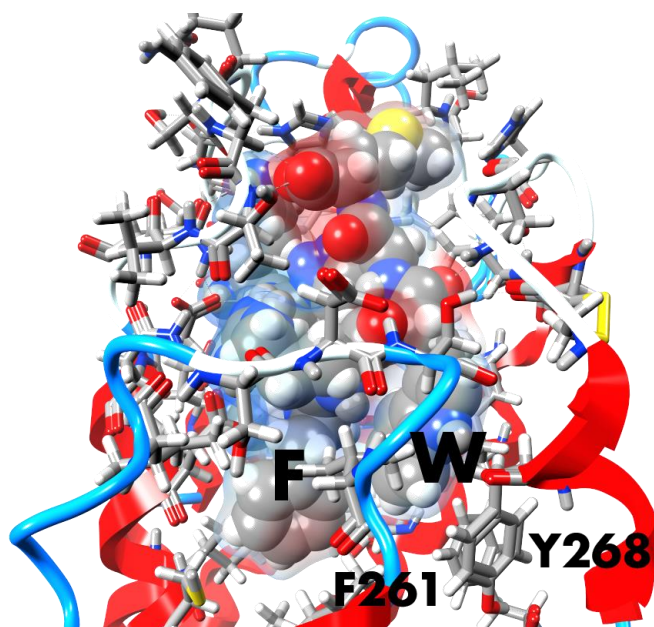

d

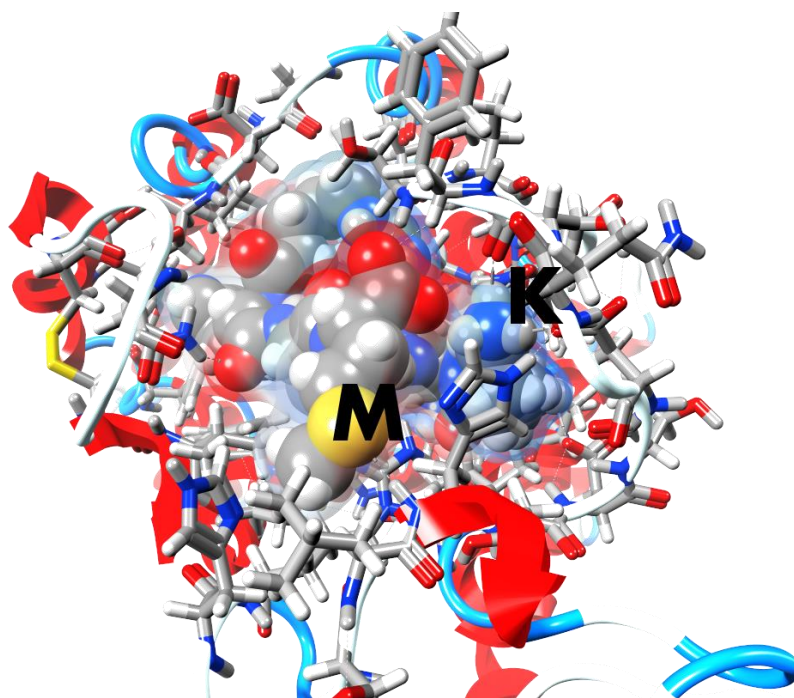

e

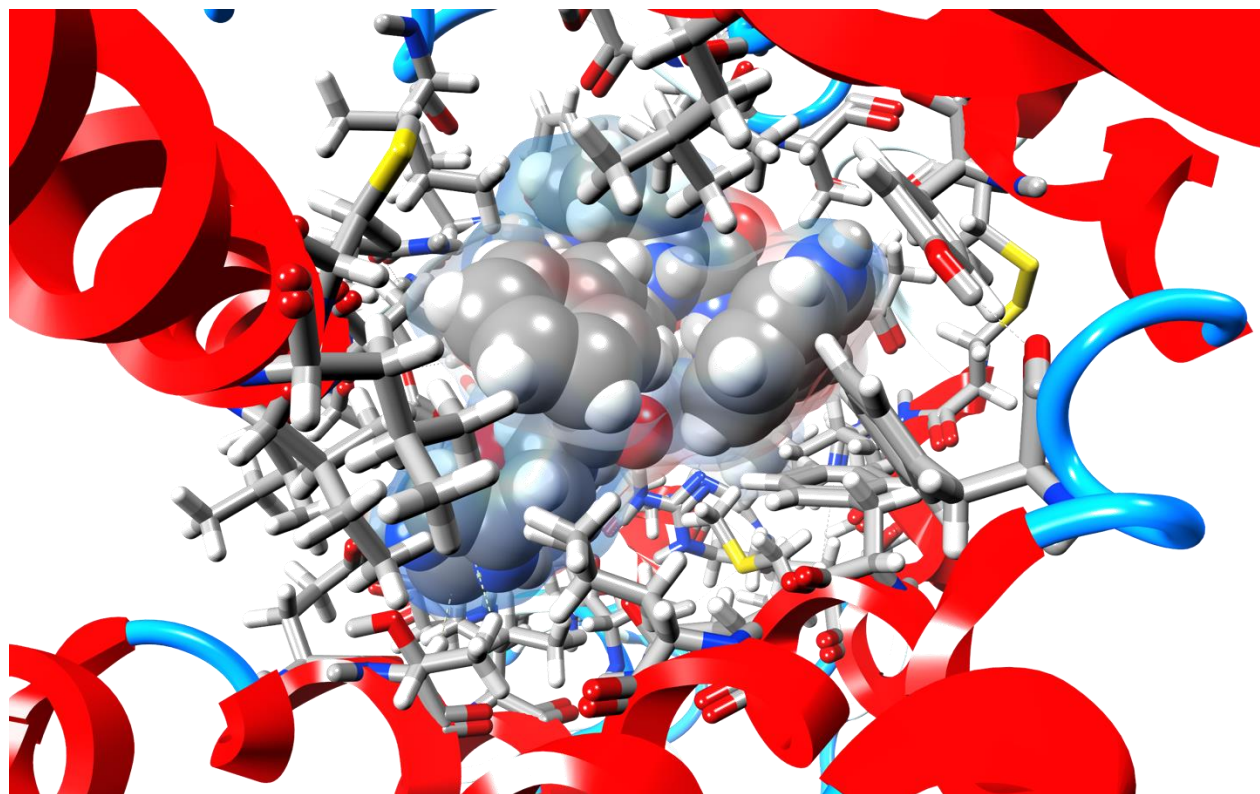

**Figure S2.** Molecular model of NOE-restricted compound **1** in complex with human MC4R. **A.** Ligand-receptor complex derived by aligning MC4R with the model from Rasmussen *et al.*<sup>63</sup> Compound **1** is displayed using the space-filling view while the receptor is shown with both secondary structures and wire frame formats. **B.** Model centered on R residue in **1** with key contact points in MC4R denoted. **C.** Model centered on the hydrophobic residues F and W of **1** with key contact points denoted. **D.** Modelled complex displayed from a vantage point along the axis of the transmembrane helical bundle towards the bound ligand from above. The extra-cyclic M and K residues are denoted on the agonist for the complexed structure. **E.** Modelled complex displayed from a vantage point along the axis of the transmembrane helical bundle towards the bound ligand from below. The pdb file used for the generation of these images is included in the supplementary information (JMC-NOE-1-MC4R.pdb).

**Table S2.** Key MC4R Residues in Contact with Compound **1** in Modelled Molecular Structure.

| Pharmacophore<br>Residue of<br>Compound <b>1</b> | H                    | f                    | R                    | W                                            |
|--------------------------------------------------|----------------------|----------------------|----------------------|----------------------------------------------|
| Contacting<br>Residues in<br>MC4R                | E100 <sup>2x60</sup> |                      |                      |                                              |
|                                                  | T101 <sup>2x61</sup> | I129 <sup>3x32</sup> |                      |                                              |
|                                                  | I104 <sup>2x64</sup> | I185 <sup>4x61</sup> | D122 <sup>3x25</sup> | F261 <sup>6x51</sup>                         |
|                                                  | I125 <sup>3x28</sup> | L197 <sup>5x43</sup> | N123 <sup>3x26</sup> | Y268 <sup>6x58</sup>                         |
|                                                  | N285 <sup>7x35</sup> | L290 <sup>7x40</sup> | D126 <sup>3x29</sup> | F284 <sup>7x34</sup><br>L290 <sup>7x40</sup> |

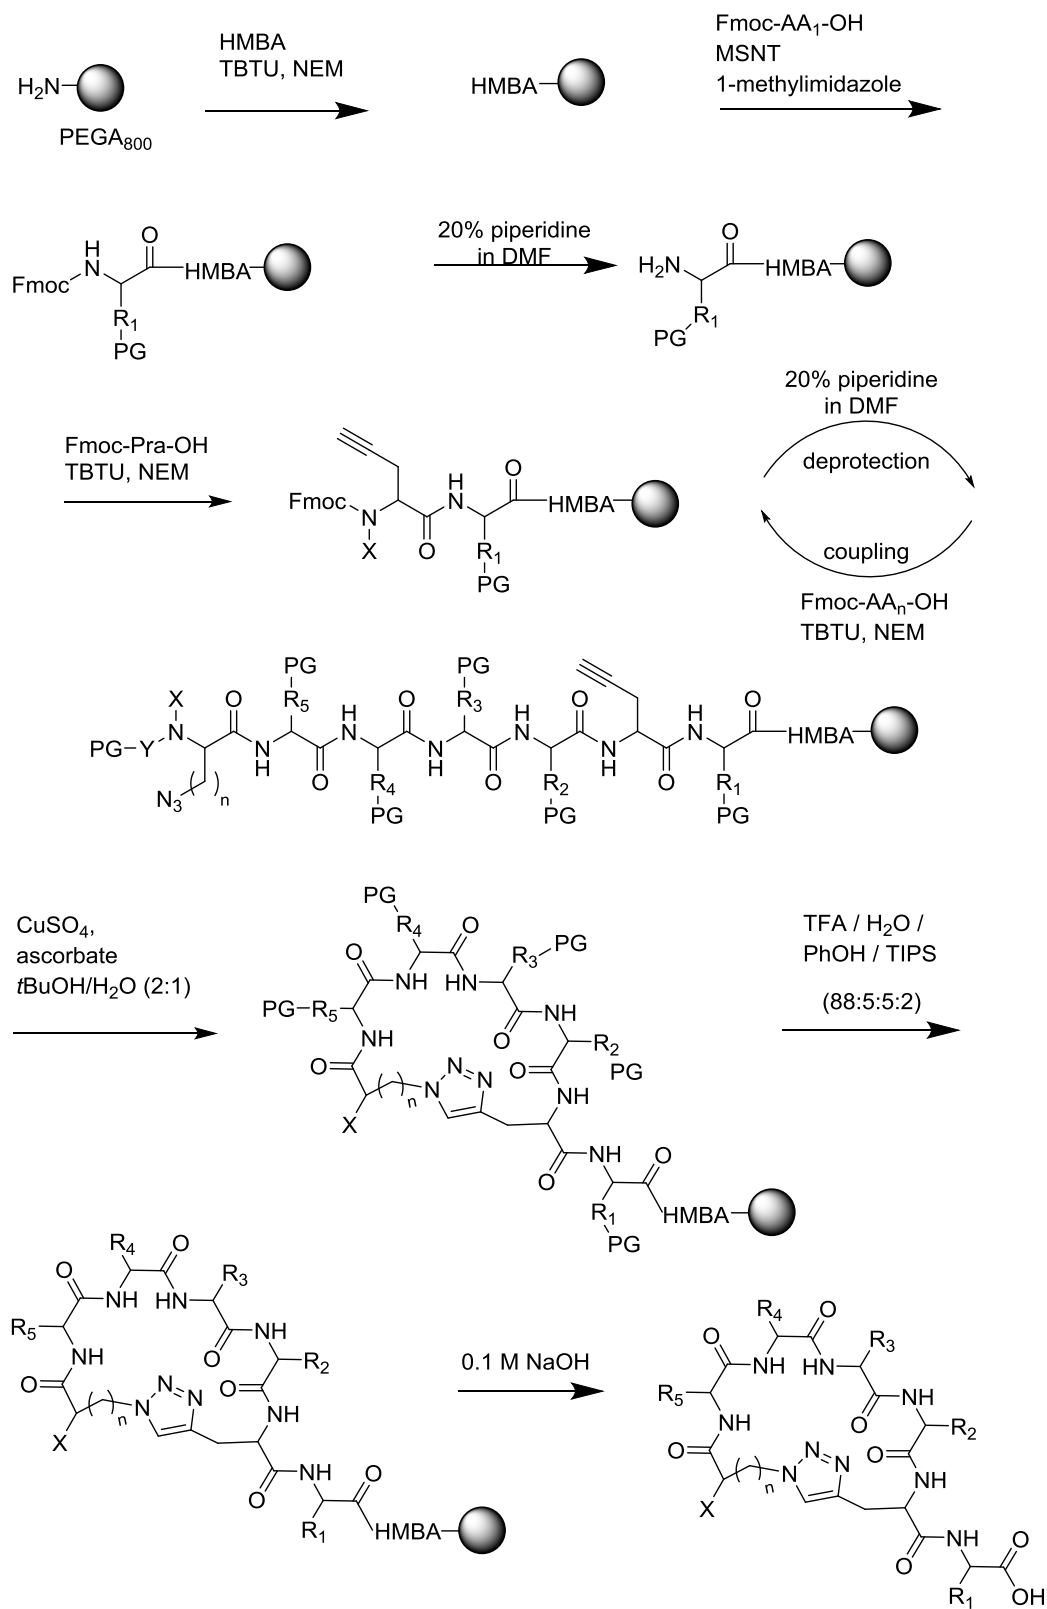

**Figure S3.** The general Fmoc-based solid phase peptide synthesis protocol used to synthesize cyclic peptides **1 – 17** in Figure S4.



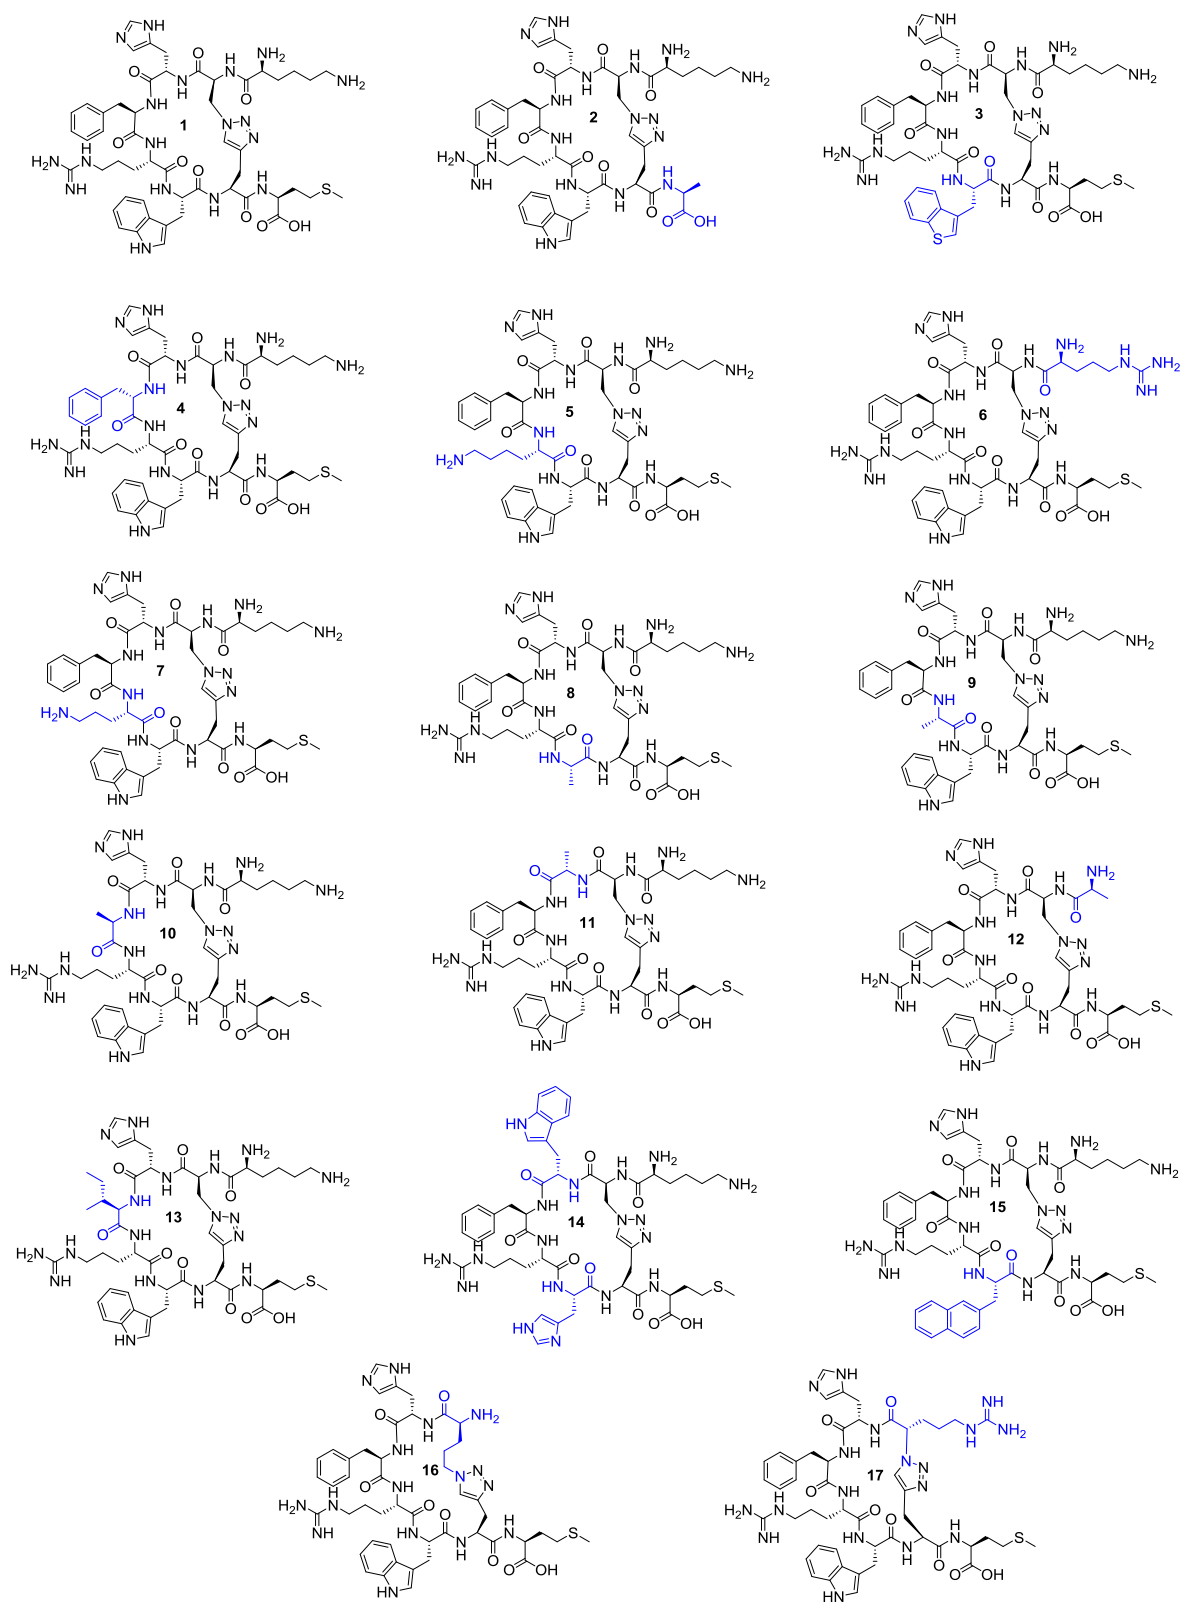

**Figure S4.** CuAAC cyclized MC3R, MC4R and MC5R ligands **1-17** used in the present study.

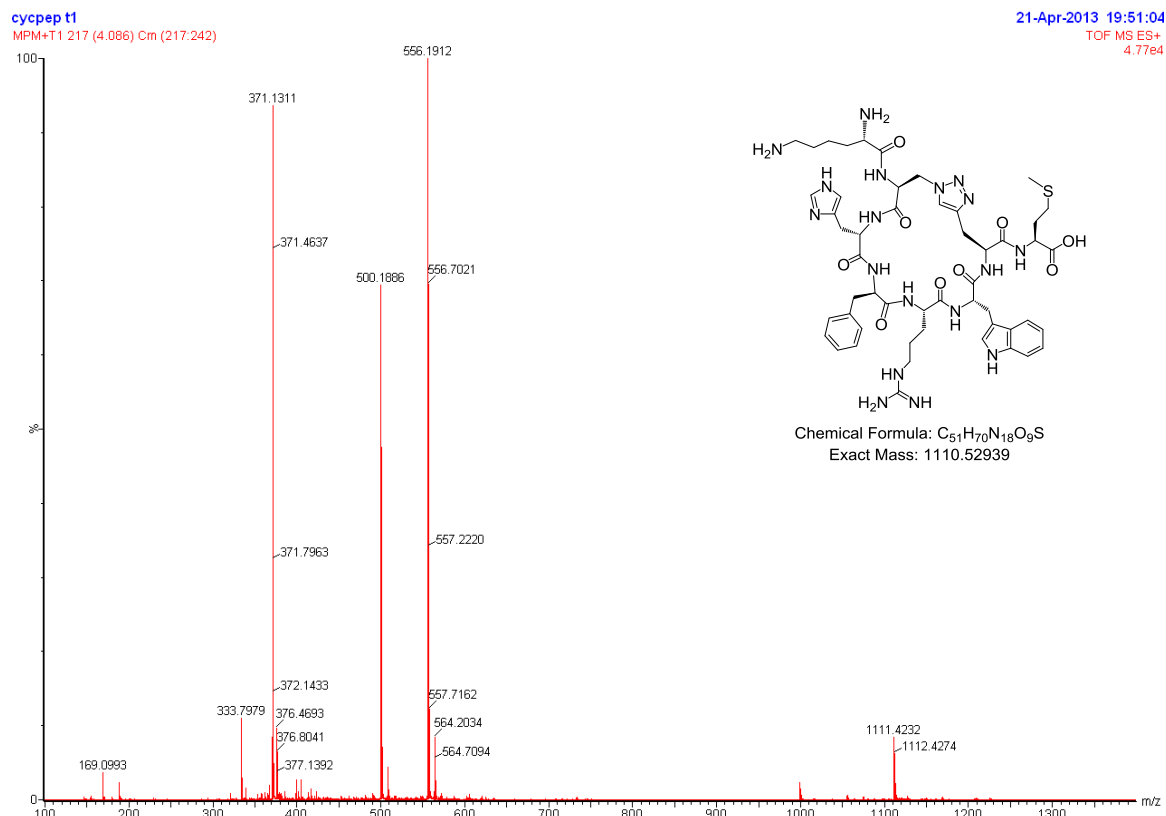

**Figure. S5.** High resolution mass spectrum of compound 1

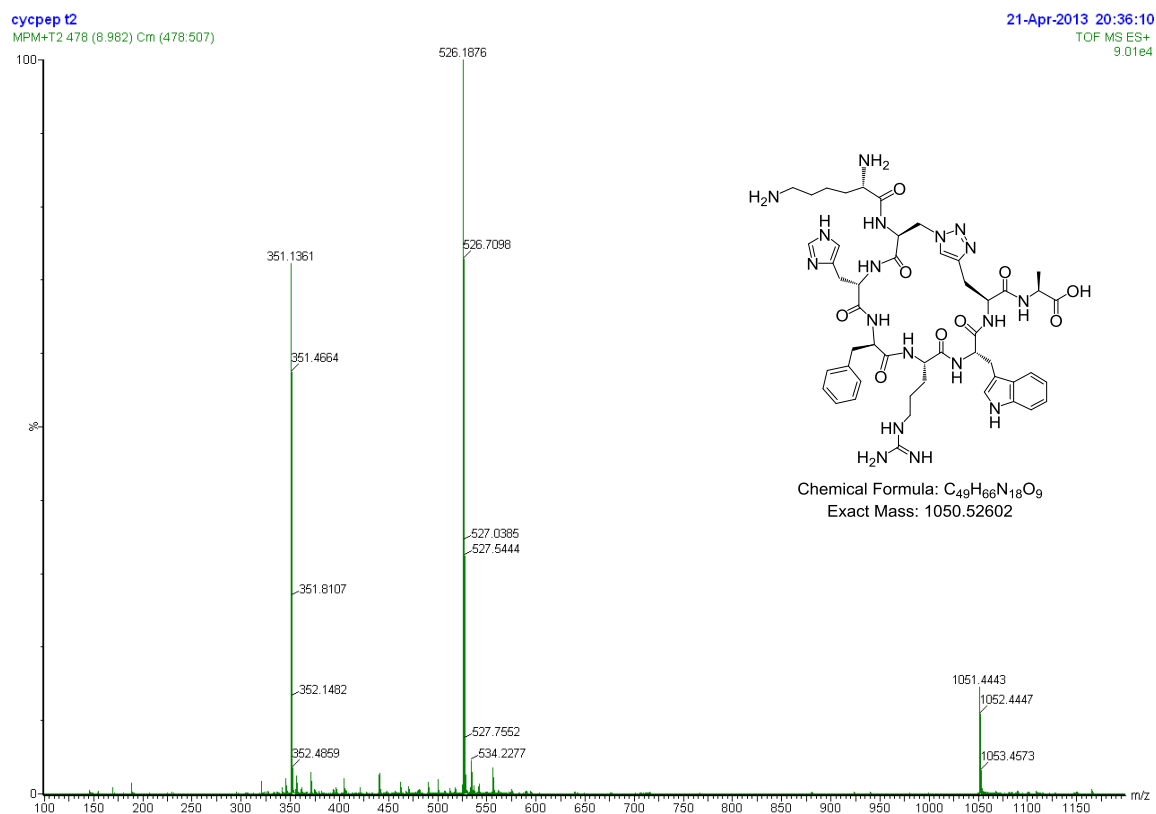

**Figure. S6.** High resolution mass spectrum of compound 2

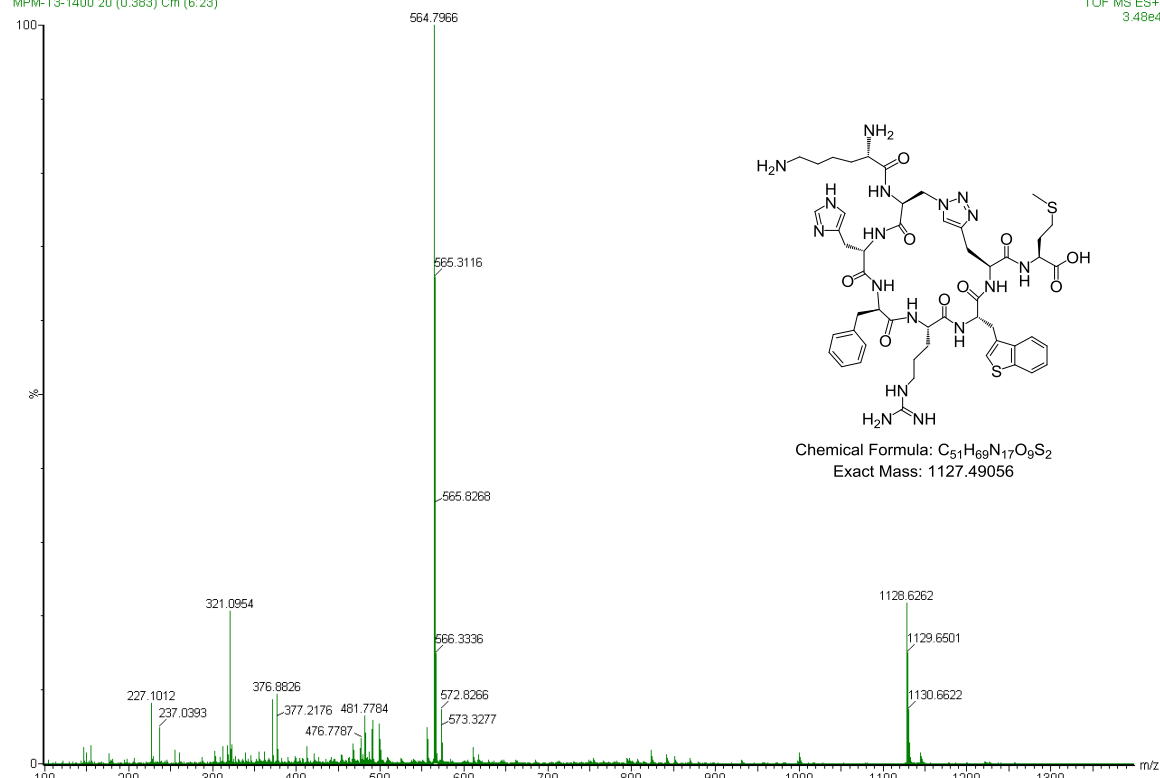

Figure. S7. High resolution mass spectrum of compound 3

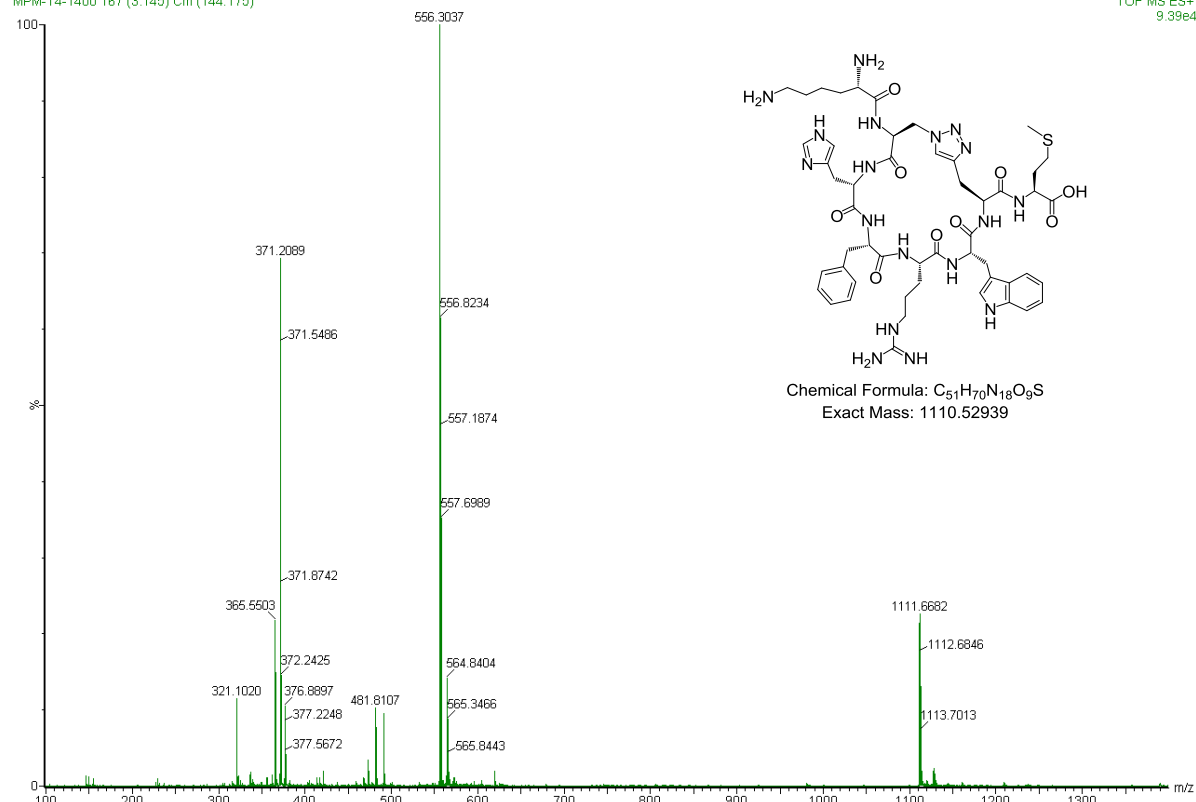

Figure. S8. High resolution ESI mass spectrum of compound 4

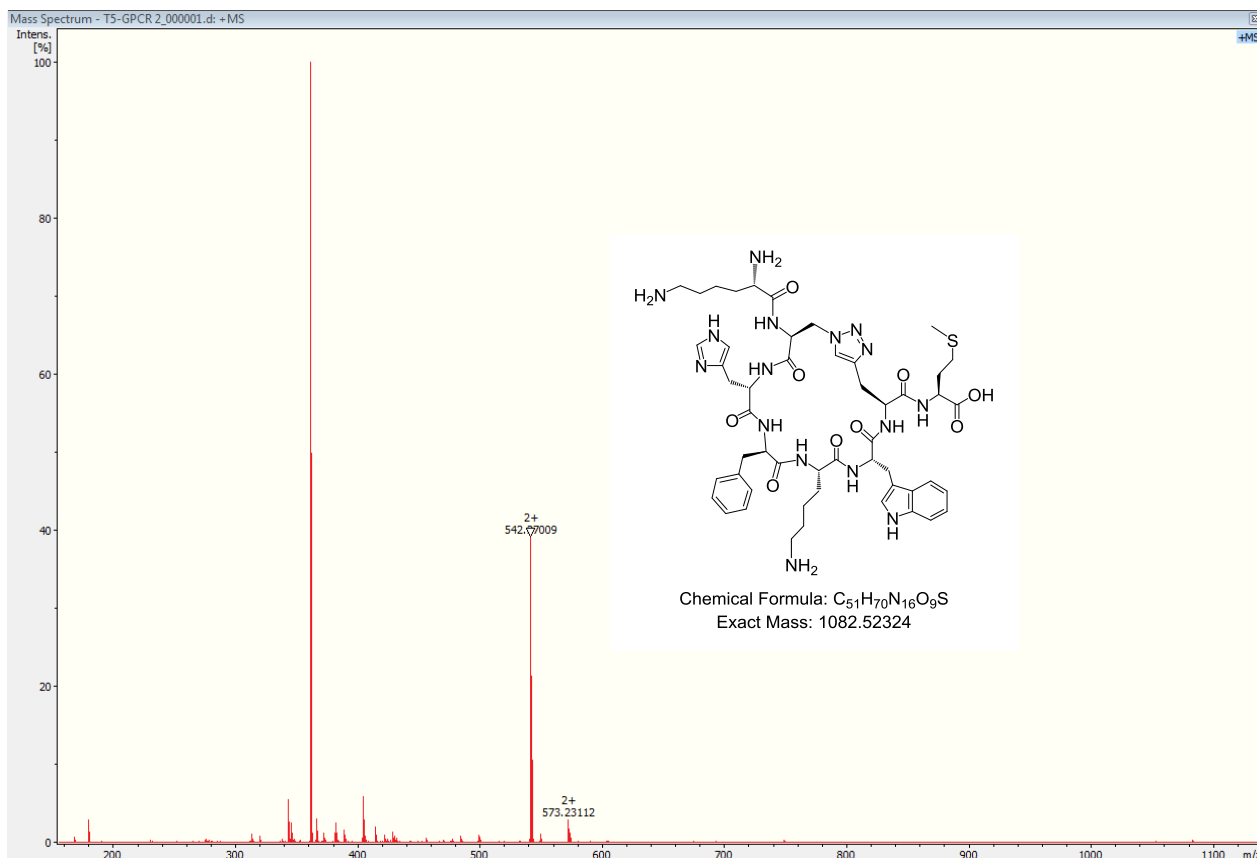

**Figure. S9.** High resolution ICR mass spectrum of compound **5**, only the double and triple charged ions were observed.

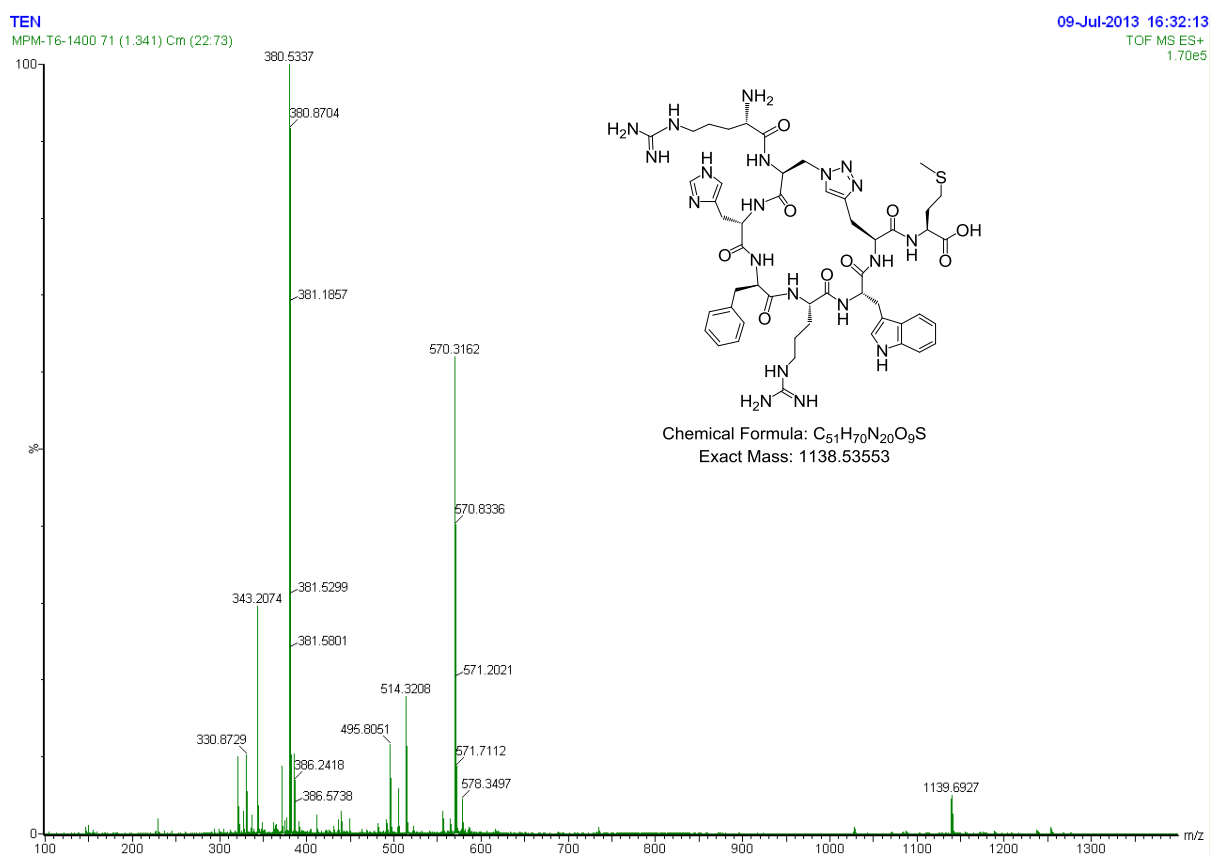

**Figure. S10.** High resolution mass spectrum of compound **6**

TEN  
MPM-T7-1400 12 (0.233) Cm (3.29)

09-Jul-2013 17:01:38  
TOF MS ES+  
8.71e4

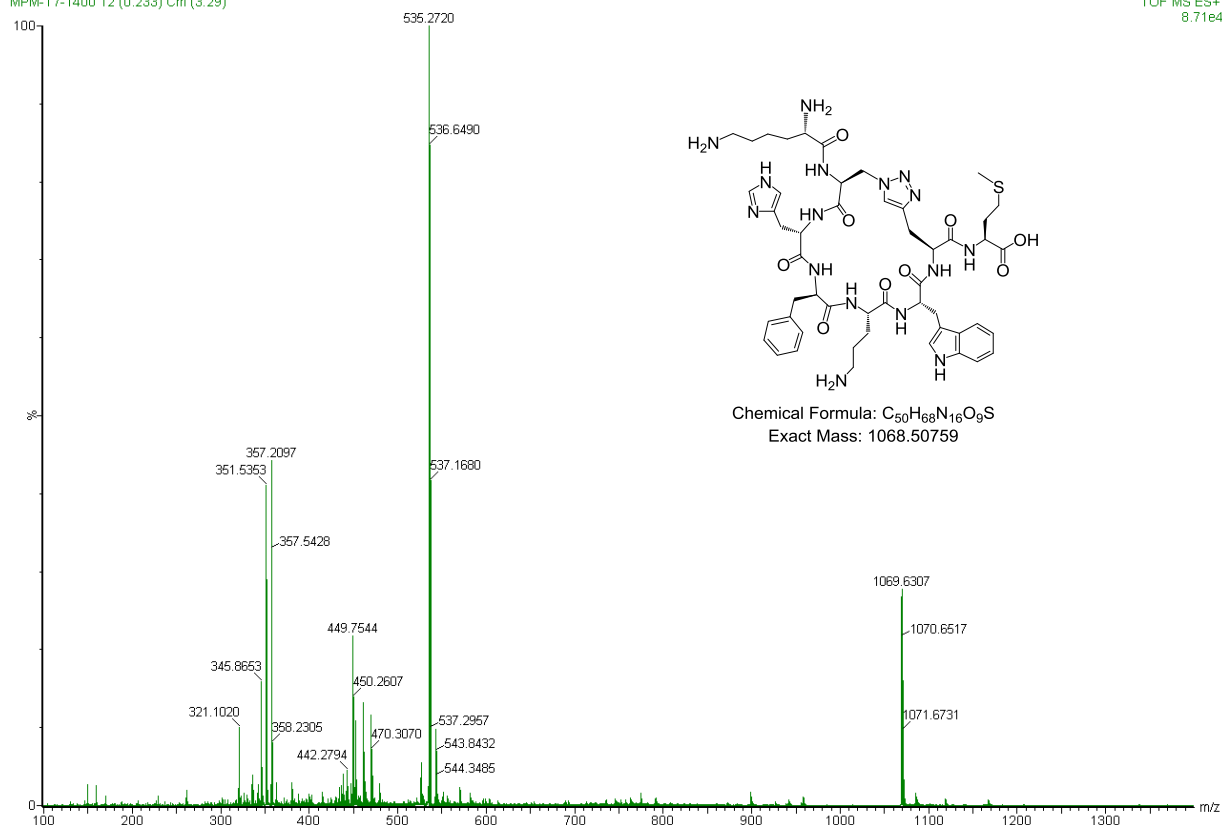

Figure. S11. High resolution mass spectrum of compound 7

TEN  
MPM-T8-1400 25 (0.477) Cm (20.44)

09-Jul-2013 17:27:56  
TOF MS ES+  
5.39e4

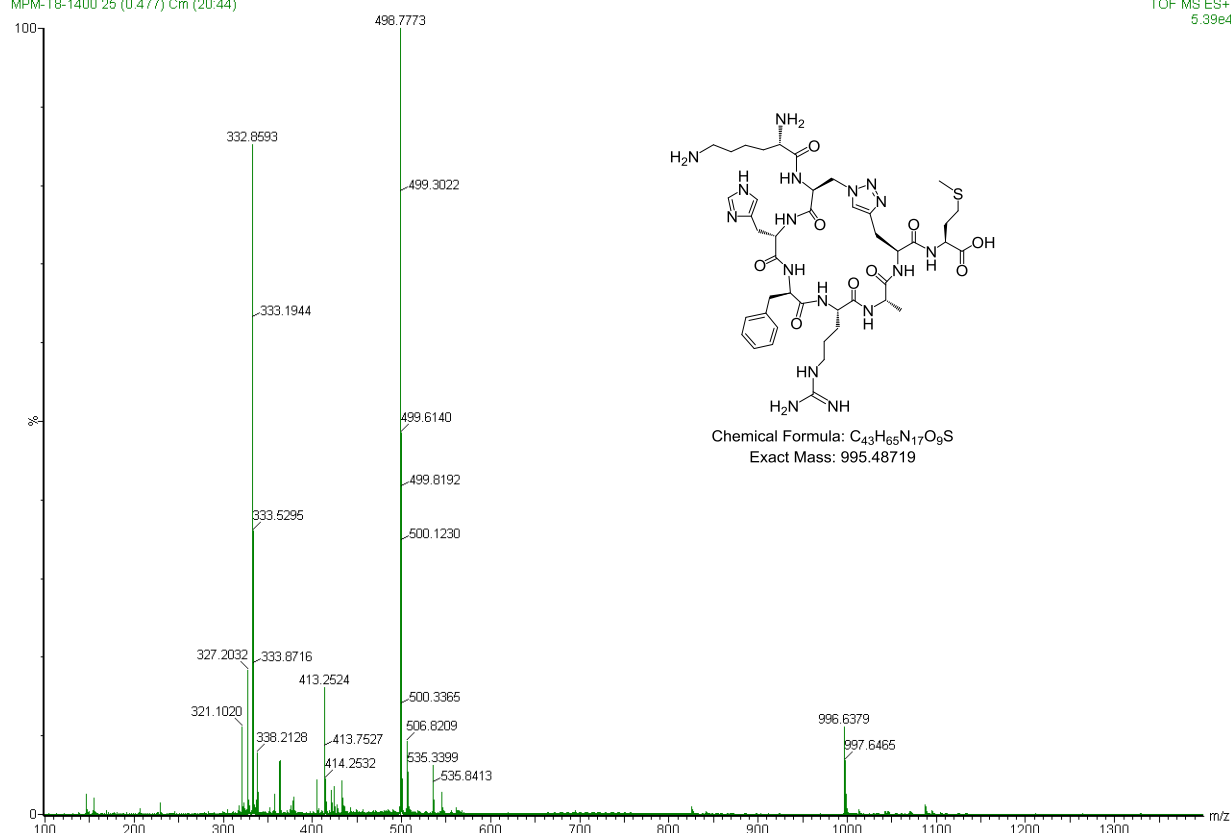

Figure. S12. High resolution mass spectrum of compound 8

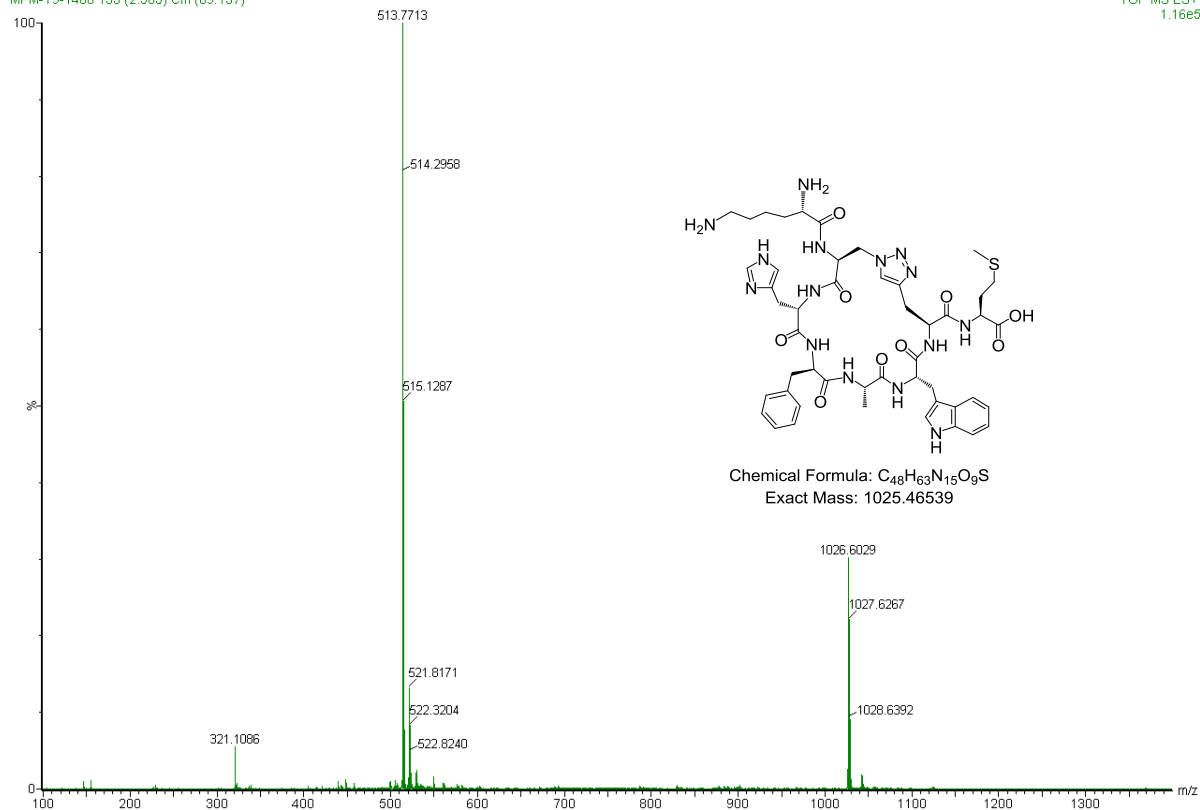

Figure. S13. High resolution mass spectrum of compound 9

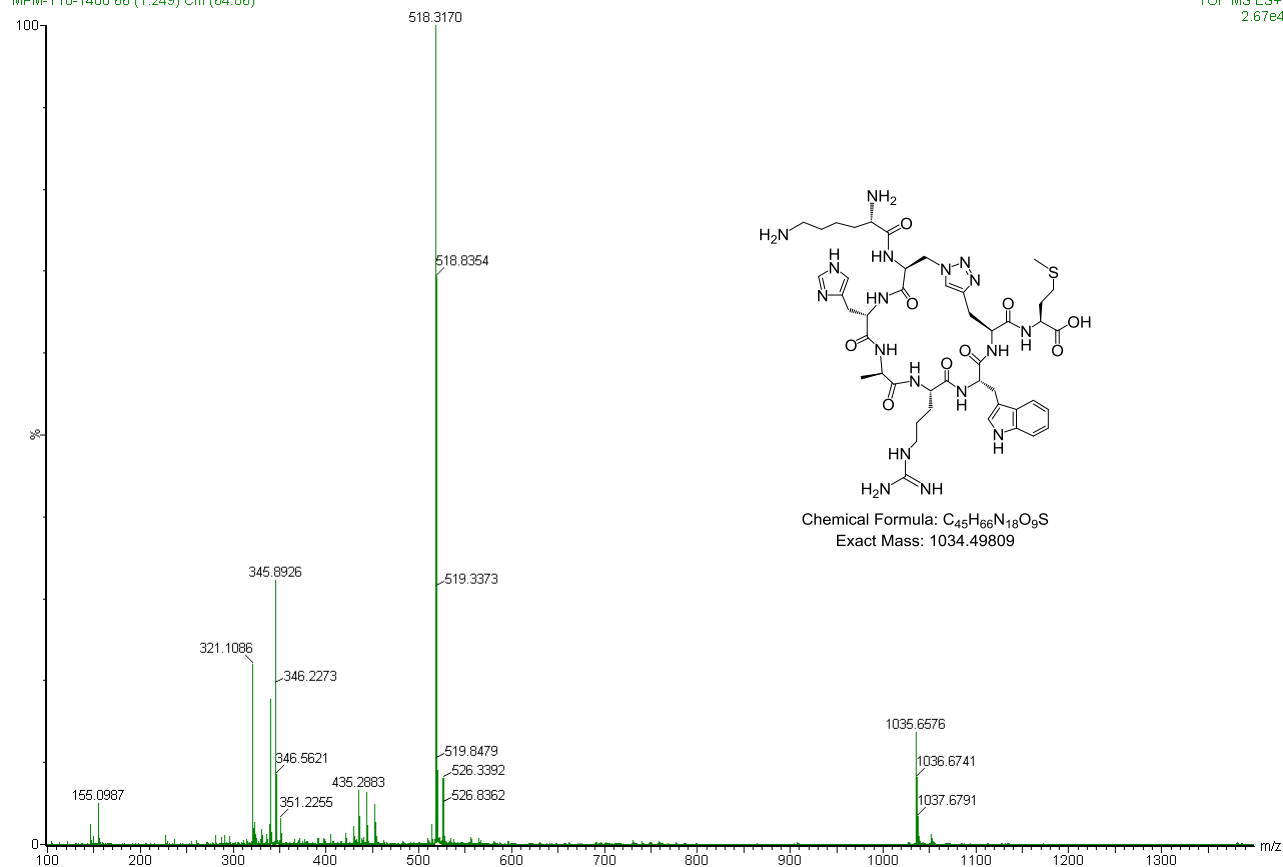

Figure. S14. High resolution mass spectrum of compound 10

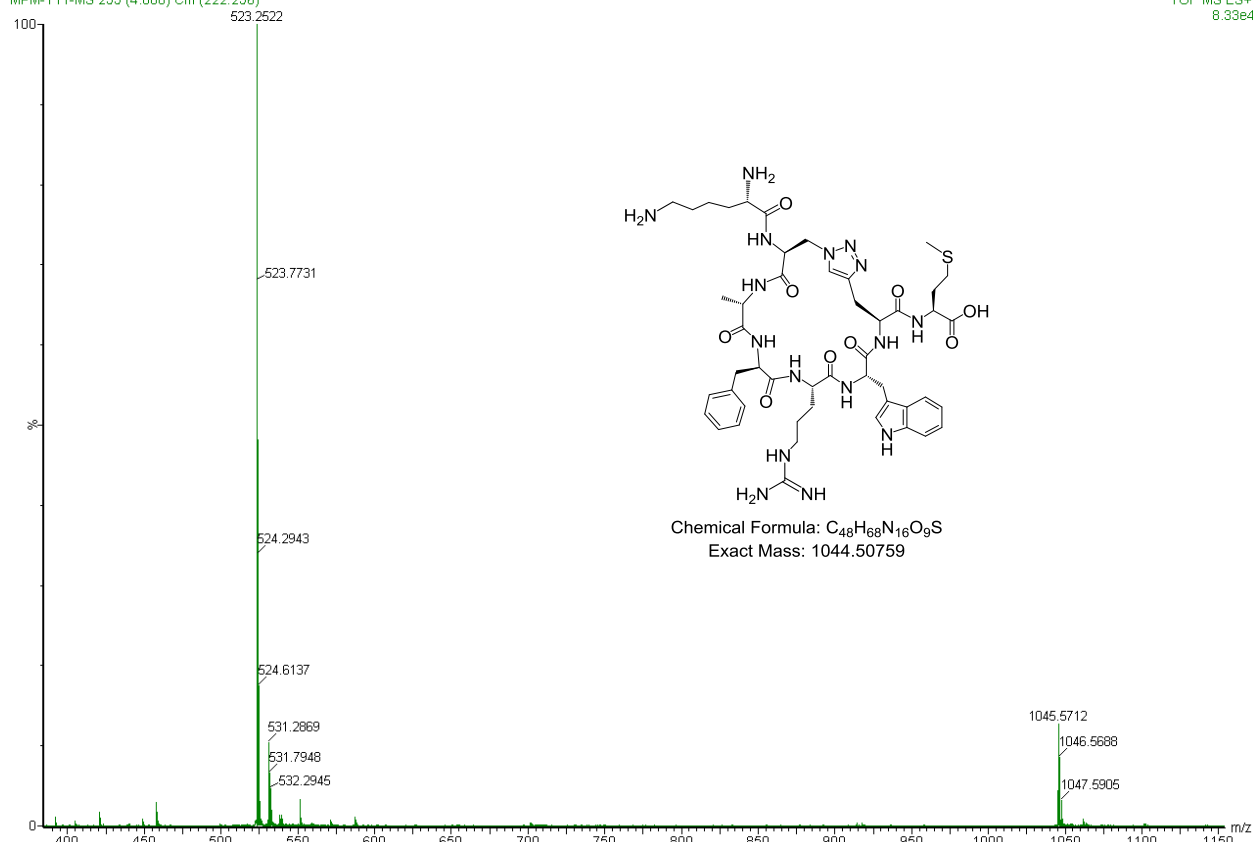

Figure. S15. High resolution mass spectrum of compound 11

H-AAHRWA(c-triazole)M-OH

MPM-T12-MS-1 59 (1.115) Cm (55.77)

04-Aug-2013 13:11:40

TOF MS ES+  
8.85e4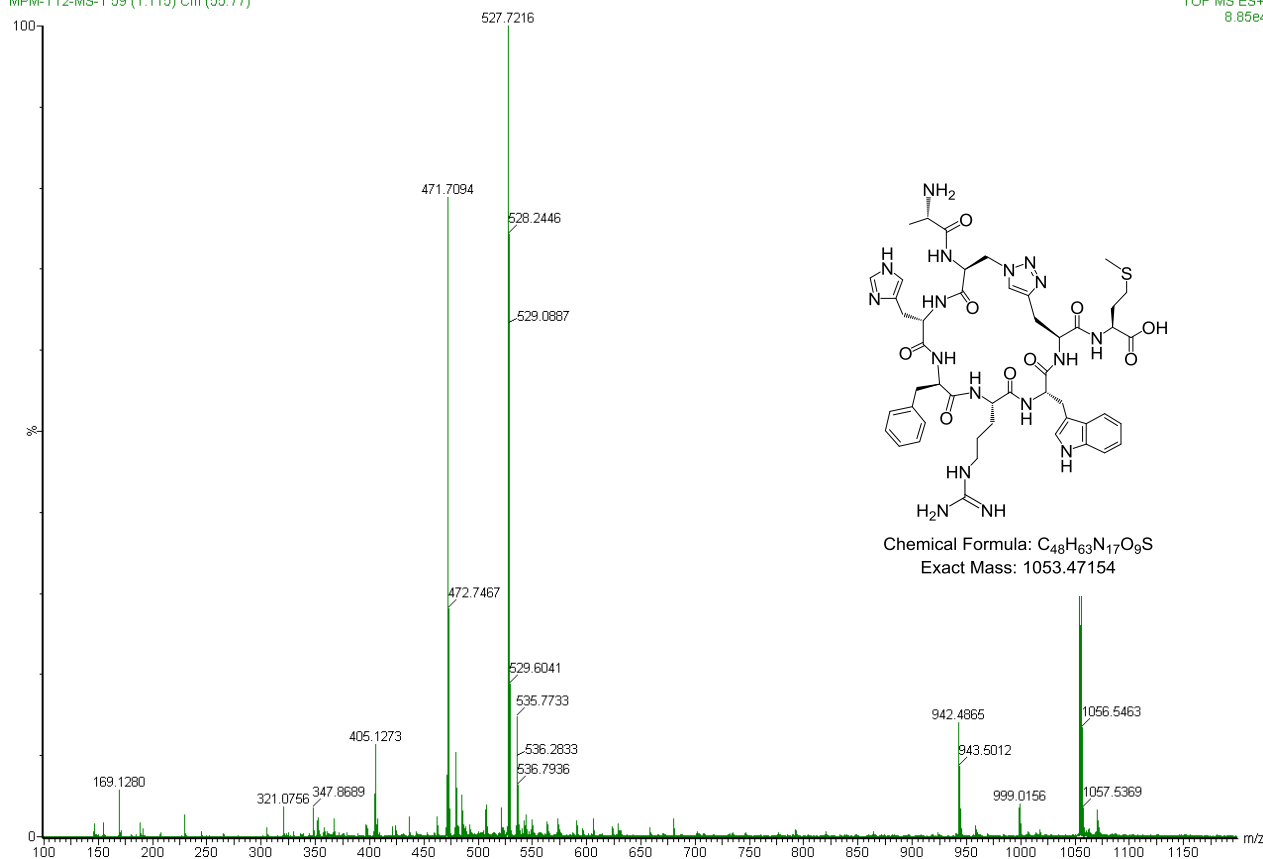

Figure. S16. High resolution mass spectrum of compound 12

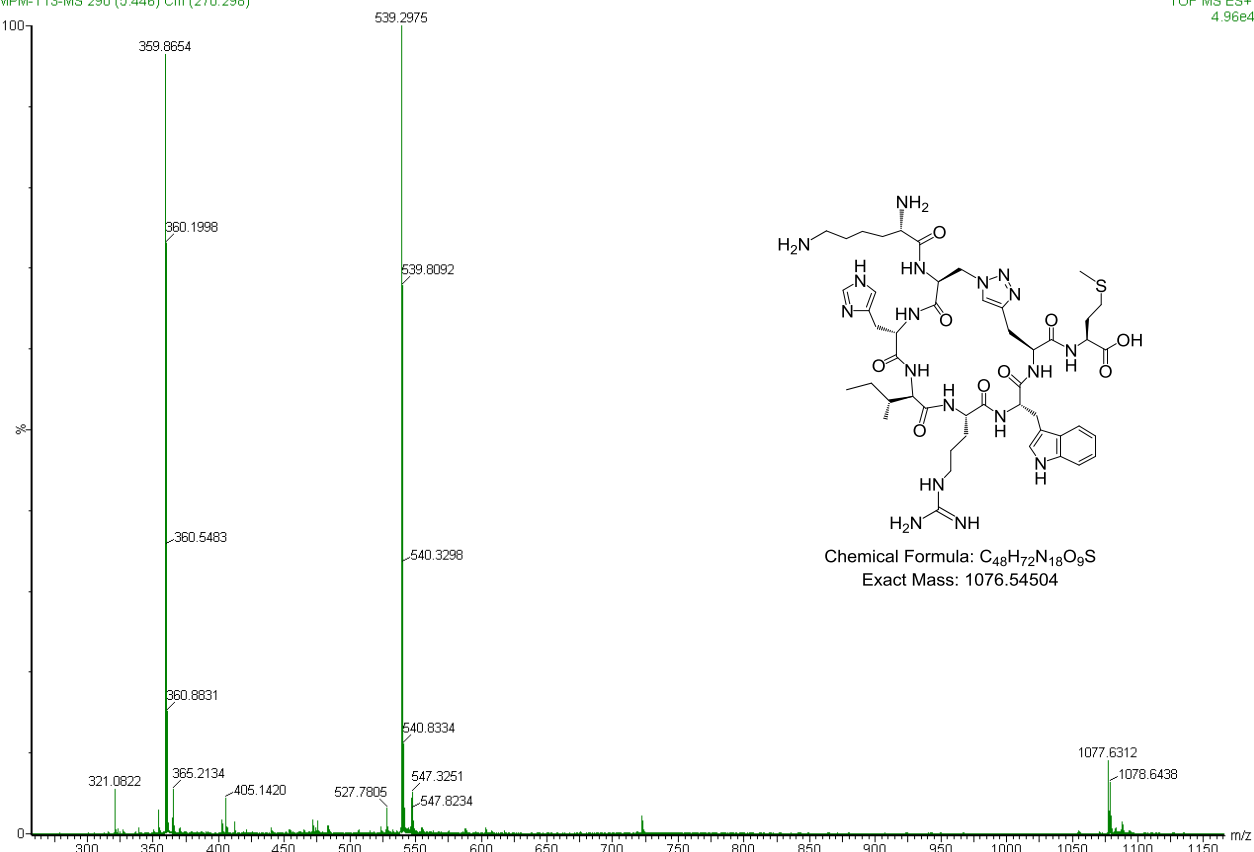

Figure. S17. High resolution mass spectrum of compound 13

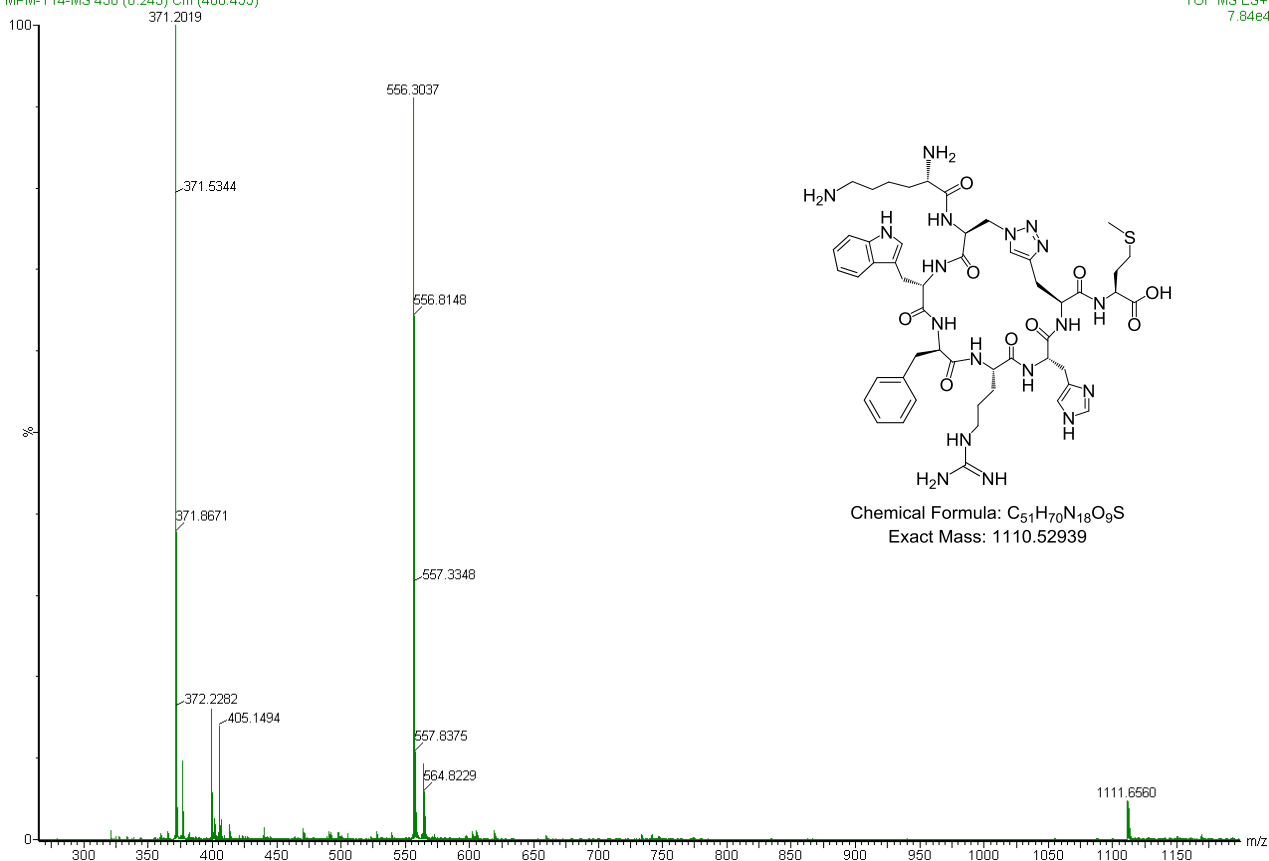

Figure. S18. High resolution mass spectrum of compound 14



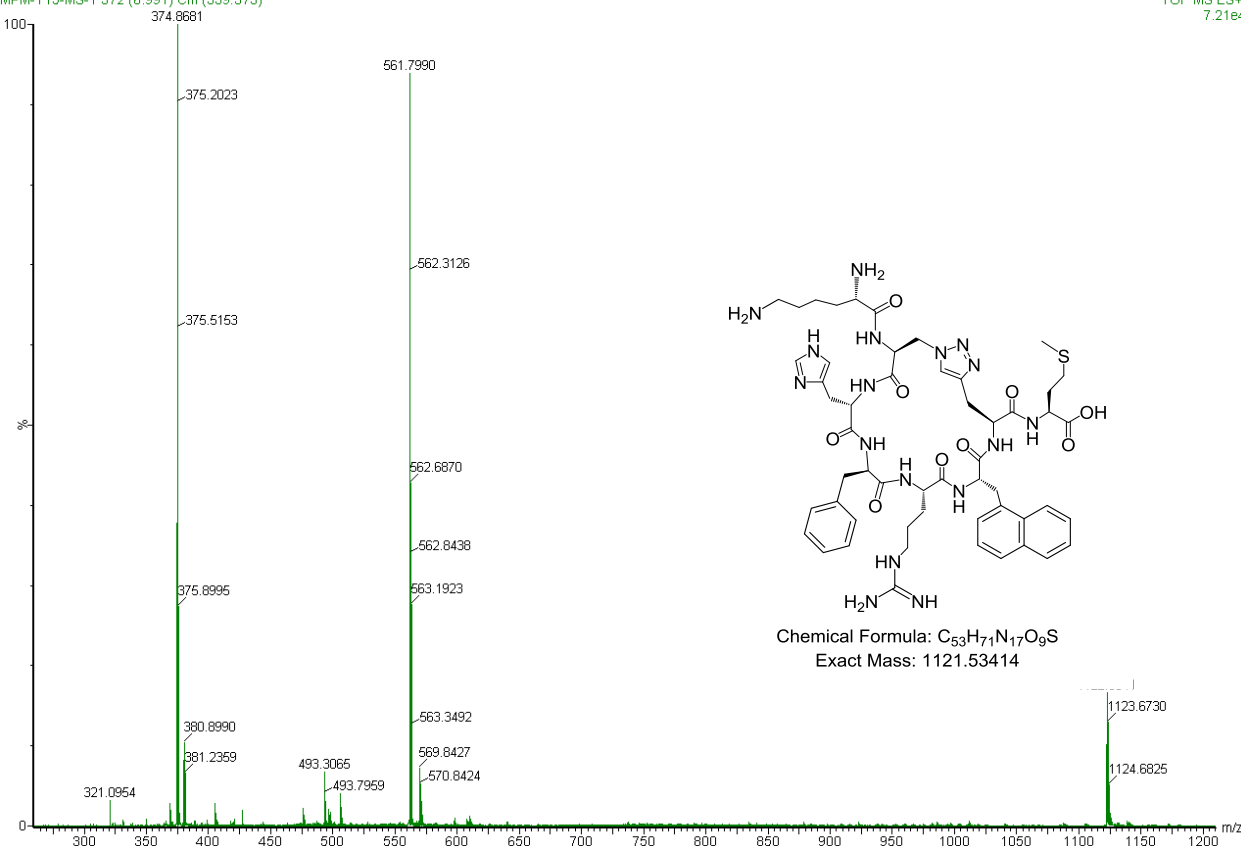

Figure S19. High resolution mass spectrum of compound 15

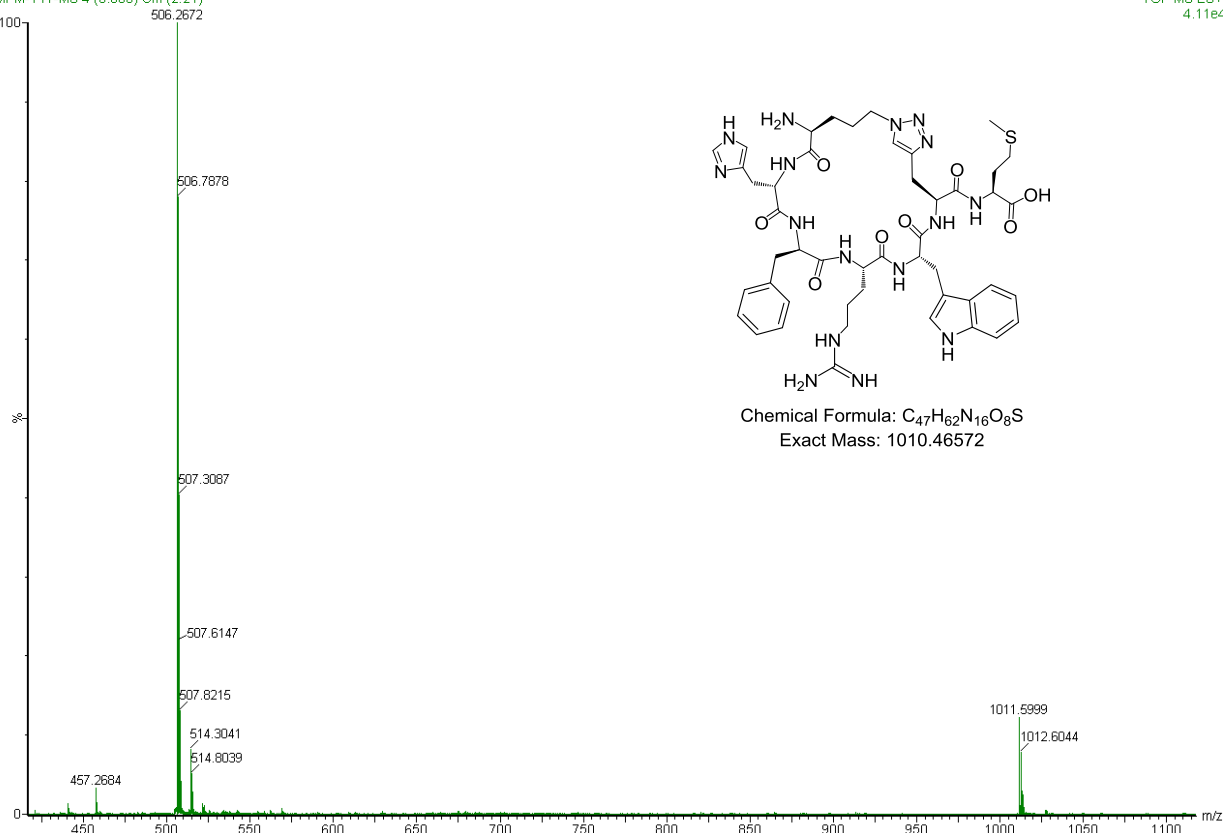

Figure S20. High resolution mass spectrum of compound 16

H-K-N3R-HfRWA(c-triazole)M-OH

MPM-T18A-MS 43 (0.816) Cm (3.50)

04-Aug-2013 15:02:56

TOF MS ES+  
8.89e4

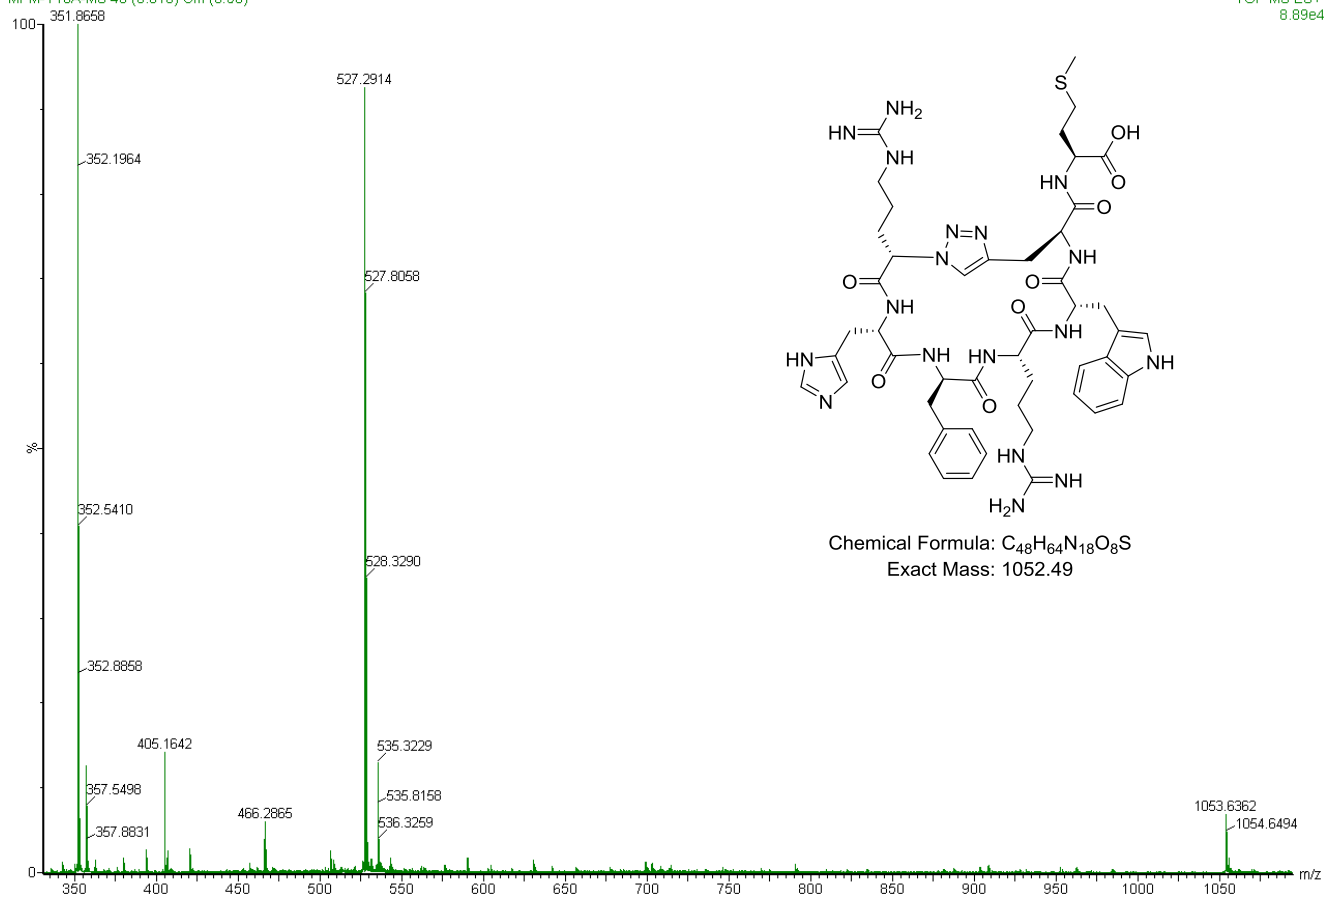

Figure. S21. High resolution mass spectrum of compound 17

**Table S3.** Assignment of the  $^1\text{H}$ -NMR spectrum of compound **1** (in  $\text{H}_2\text{O}/\text{D}_2\text{O}$ : 9/1 containing 2 % deuterated-acetic acid) and the relative NOEs (NOESY, 800 MHz, 1024 x 512, 50 ms and 300 ms mixing time) obtained by peak volume integration using Topspin (Bruker). For assigning the COSY experiment and NOSEY/ROESY, experiments with various mixing times (50, 100, 200, 300, 400 and 600 ms) were recorded. Correlations with known fixed distances are marked in grey. The  $\text{CH}_2$  NOE-correlations were generally too close to the diagonal to be used as reference for the distance calculation except that of Met- $\text{H}^\beta$ . However, the best reference was that of the Trp indole  $\text{NH} - \text{H}^2$  providing a balanced calculation of the 73 NOE-distances used in the MD-simulations.

| Aa  | $^1\text{H}$             | $\delta/\text{ppm}$ | Number (multiplicity) | NOE    | $^1\text{H}$            | dist | NOE    | $^1\text{H}$                 | dist | NOE    | $^1\text{H}$     | dist | NOE    | $^1\text{H}$    | dist | $^{13}\text{C} - \delta/\text{ppm}$ |
|-----|--------------------------|---------------------|-----------------------|--------|-------------------------|------|--------|------------------------------|------|--------|------------------|------|--------|-----------------|------|-------------------------------------|
| K   | $\text{K}^a$             | 3.958               | 1 (t)                 | 0.0072 | $\text{K}^{b1}$         | 3.13 | 0.0122 | $\text{K}^{b2}$              | 2.87 |        |                  |      |        |                 |      | 52.65                               |
|     | $\text{K}^{b1}$          | 1.729               | 1 (m)                 |        |                         |      |        |                              |      |        |                  |      |        |                 |      | 30.22                               |
|     | $\text{K}^{b2}$          | 1.765               | 1 (m)                 | 0.01   | $\text{Dap}^N$          | 2.90 |        |                              |      |        |                  |      |        |                 |      |                                     |
|     | $\text{K}^g$             | 1.319               | 2 (t)                 | 0.1281 | $\text{K}^{b1}$         | 1.94 | 0.1006 | $\text{K}^{b2}$              | 2.02 |        |                  |      |        |                 |      | 21.12                               |
|     | $\text{K}^d$             | 1.38                | 2 (t)                 | 0.0286 | $\text{K}^g$            | 2.49 |        |                              |      |        |                  |      |        |                 |      | 26.27                               |
|     | $\text{K}^e$             | 2.869               | 2 (t)                 |        |                         |      |        |                              |      |        |                  |      |        |                 |      | 38.89                               |
|     | $\text{K}^N$             | 4.735               | 2 (bs)                | 0.0270 | $\text{Dap}^N$          | 2.51 |        |                              |      |        |                  |      |        |                 |      |                                     |
| Dap | $\text{Dap}^a$           | 4.668               | -                     | 0.0186 | $\text{H}^N$            | 2.67 |        |                              |      |        |                  |      |        |                 |      | 53.41                               |
|     | $\text{Dap}^{b1}$        | 2.823               | 1 (d)                 | 0.0239 | $\text{R}^{\text{Gua}}$ | 2.56 | 0.0083 | $\text{Dap}^N$               | 3.06 |        |                  |      |        |                 |      | 38.89                               |
|     | $\text{Dap}^{b2}$        | 2.907               | 1 (d)                 | 0.0410 | $\text{R}^{\text{Gua}}$ | 2.34 | 0.0146 | $\text{Dap}^N$               | 2.78 |        |                  |      |        |                 |      |                                     |
|     | $\text{Dap}^N$           | 8.675               | 1 (d)                 | 0.0173 | $\text{H}^b$            | 2.71 | 0.0341 | $\text{K}^a$                 | 2.42 | 0.0200 | $\text{Dap}^a$   | 2.64 |        |                 |      |                                     |
| H   | $\text{H}^a$             | 4.508               | -                     | 0.0367 | $\text{Pra}^{b2}$       | 2.39 | 0.0438 | $\text{H}^{b1}$              | 2.32 | 0.0382 | $\text{H}^{b2}$  | 2.37 |        |                 |      | 55.35                               |
|     | $\text{H}^{b1}$          | 2.856               | 1 (dd)                | 1      | $\text{H}^{b2}$         | 1.38 |        |                              |      |        |                  |      |        |                 |      | 26.87                               |
|     | $\text{H}^{b2}$          | 2.941               | 1 (dd)                | 0.0168 | $\text{H}^N$            | 2.72 |        |                              |      |        |                  |      |        |                 |      |                                     |
|     | $\text{H}^2$             | 8.411               | 1 (s)                 |        |                         |      |        |                              |      |        |                  |      |        |                 |      | 133.29                              |
|     | $\text{H}^4$             | 6.928               | 1 (s)                 | 0.0087 | $\text{R}^{d2}$         | 3.03 |        |                              |      |        |                  |      |        |                 |      | 117.18                              |
|     | $\text{H}^N$             | 8.639               | 0.3 (m)               | 0.0256 | $\text{H}^a$            | 2.53 | 0.0075 | $\text{Pra}^{\text{5-Tria}}$ | 3.10 |        |                  |      |        |                 |      |                                     |
|     | $\text{H}^{\text{imNH}}$ | 9.874               | 1 (m)                 | 0.0035 | $\text{H}^{b1}$         | 3.53 | 0.0024 | $\text{H}^{b2}$              | 3.76 |        |                  |      |        |                 |      |                                     |
| f   | $\text{f}^a$             | 4.557               | -                     | 0.0479 | $\text{f}^{b2}$         | 2.28 | 0.0179 | $\text{f}^{b1}$              | 2.69 | 0.0201 | $\text{f}^{2,6}$ | 2.64 |        |                 |      | 55.01                               |
|     | $\text{f}^{b1}$          | 2.808               | 1 (dd)                | 0.4179 | $\text{f}^{b2}$         | 1.59 | 0.0416 | $\text{f}^N$                 | 2.34 |        |                  |      |        |                 |      | 37.43                               |
|     | $\text{f}^{b2}$          | 2.941               | 1 (dd)                | 0.0162 | $\text{R}^{g2}$         | 2.74 | 0.0559 | $\text{f}^N$                 | 2.23 |        |                  |      |        |                 |      |                                     |
|     | $\text{f}^{2,6}$         | 7.107               | 1 (m)                 | 0.0488 | $\text{f}^{b1}$         | 2.28 | 0.0421 | $\text{f}^{b2}$              | 2.33 | 0.0088 | $\text{W}^N$     | 3.03 | 0.0049 | $\text{f}^N$    | 3.34 | 129.00                              |
|     | $\text{f}^{3,5}$         | 7.230               | 1 (m)                 | 0.3620 | $\text{f}^{2,6}$        | 1.63 | 0.0117 | $\text{f}^{b1}$              | 2.89 | 0.0158 | $\text{f}^{b2}$  | 2.75 |        |                 |      | 128.73                              |
|     | $\text{f}^4$             | 7.185               | 1 (d)                 | 0.6539 | $\text{f}^{3,5}$        | 1.48 |        |                              |      |        |                  |      |        |                 |      | 127.28                              |
|     | $\text{f}^N$             | 8.585               | 1 (d)                 | 0.0405 | $\text{H}^{1b}$         | 2.35 | 0.1030 | $\text{H}^a$                 | 2.01 | 0.0304 | $\text{f}^a$     | 2.46 | 0.0058 | $\text{R}^N$    | 3.25 |                                     |
| R   | $\text{R}^a$             | 3.868               | 1 (m)                 | 0.0380 | $\text{R}^b$            | 2.37 | 0.0430 | $\text{R}^a$                 | 2.33 |        |                  |      |        |                 |      | 54.07                               |
|     | $\text{R}^b$             | 1.217               | 1 (m)                 | 0.0250 | $\text{R}^N$            | 2.55 | 0.02   | $\text{W}^N$                 | 2.64 | 0.0101 | $\text{R}^{d2}$  | 2.96 |        |                 |      | 27.81                               |
|     | $\text{R}^{g1}$          | 0.779               | 1 (m)                 | 0.0475 | $\text{R}^b$            | 2.29 | 0.0097 | $\text{R}^N$                 | 2.98 | 0.0022 | $\text{W}^N$     | 3.82 |        |                 |      | 23.61                               |
|     | $\text{R}^{g2}$          | 0.89                | 1 (m)                 | 0.4330 | $\text{R}^{g1}$         | 1.58 | 0.0112 | $\text{R}^N$                 | 2.91 | 0.0058 | $\text{W}^N$     | 3.25 | 0.0634 | $\text{R}^b$    | 2.18 |                                     |
|     | $\text{R}^{d1}$          | 2.718               | 1 (m)                 | 0.0085 | $\text{R}^{g2}$         | 3.05 | 0.0244 | $\text{R}^{g1}$              | 2.55 |        |                  |      |        |                 |      | 40.27                               |
|     | $\text{R}^{d2}$          | 2.728               | 1 (m)                 | 0.0168 | $\text{R}^{g1}$         | 2.72 |        |                              |      |        |                  |      |        |                 |      |                                     |
|     | $\text{R}^N$             | 8.103               | 1 (m)                 | 0.0190 | $\text{R}^a$            | 2.66 | 0.0821 | $\text{f}^a$                 | 2.09 | 0.0060 | $\text{f}^{b1}$  | 3.23 | 0.0089 | $\text{f}^{b2}$ | 3.03 |                                     |



**Table S4.** The distances from a NOESY experiment of compound **1** applied in the restrained molecular dynamic calculations using Molecular Operation Environment (MOE, CCG). Weights for short range NOE's smaller than 3 Å were set at 1, while weights for short range distances larger than 3 Å were set at 0.5 in all restrained MD calculations. The final simulated distances correlated quite accurately with those listed in table S3.

| Type       | Weight     | [L,U]       | Atoms                  |
|------------|------------|-------------|------------------------|
| > distance | 5.000e-001 | [3.13,3.14] | 7:LYS4.(HB2 HA)        |
| > distance | 1.000e+000 | [2.87,2.88] | 7:LYS4.(HB3 HA)        |
| > distance | 1.000e+000 | [1.94,2.1]  | 7:LYS4.(HG2 HB3)       |
| > distance | 1.000e+000 | [2.02,2.03] | 7:LYS4.(HG3 HB2)       |
| > distance | 1.000e+000 | [2.49,2.7]  | 7:LYS4.(HD2 HG2)       |
| > distance | 1.000e+000 | [2.49,2.7]  | 7:LYS4.(HD3 HG3)       |
| > distance | 1.000e+000 | [2.51,2.52] | 7:ALA5.H 7:LYS4.H2     |
| > distance | 1.000e+000 | [2.42,2.43] | 7:ALA5.H 7:LYS4.HA     |
| > distance | 1.000e+000 | [2.9,2.92]  | 7:ALA5.H 7:LYS4.HB3    |
| > distance | 1.000e+000 | [2.67,2.68] | 7:ALA5.(H HA)          |
| > distance | 5.000e-001 | [3.06,3.07] | 7:ALA5.(H HB2)         |
| > distance | 1.000e+000 | [2.78,2.79] | 7:ALA5.(H HB3)         |
| > distance | 1.000e+000 | [2.67,2.68] | 7:HIS6.H 7:ALA5.HA     |
| > distance | 1.000e+000 | [3.1,3.2]   | 7:HIS6.H 7:ALA5.H      |
| > distance | 1.000e+000 | [2.53,2.54] | 7:HIS6.(HA H)          |
| > distance | 1.000e+000 | [2.32,2.33] | 7:HIS6.(HB2 HA)        |
| > distance | 1.000e+000 | [2.7,2.75]  | 7:HIS6.(HB3 H)         |
| > distance | 1.000e+000 | [2.37,2.38] | 7:HIS6.(HB3 HA)        |
| > distance | 5.000e-001 | [3.53,3.54] | 7:HIS6.(HD2 HB2)       |
| > distance | 5.000e-001 | [3.76,3.77] | 7:HIS6.(HD2 HB3)       |
| > distance | 2.000e+000 | [3.82,3.83] | 7:DPN7.H 7:ALA5.H      |
| > distance | 1.000e+000 | [2.01,2.02] | 7:DPN7.H 7:HIS6.HA     |
| > distance | 1.000e+000 | [2.35,2.36] | 7:DPN7.H 7:HIS6.HB2    |
| > distance | 1.000e+000 | [2.46,2.47] | 7:DPN7.(HA H)          |
| > distance | 1.000e+000 | [2.34,2.35] | 7:DPN7.(HB2 H)         |
| > distance | 1.000e+000 | [2.49,2.5]  | 7:DPN7.(HB2 HA)        |
| > distance | 1.000e+000 | [2.23,2.24] | 7:DPN7.(HB3 H)         |
| > distance | 1.000e+000 | [2.69,2.7]  | 7:DPN7.(HB3 HA)        |
| > distance | 1.000e+000 | [2.64,2.65] | 7:DPN7.(HD1 HA)        |
| > distance | 5.000e-001 | [3.34,3.35] | 7:DPN7.(HD2 H)         |
| > distance | 1.000e+000 | [2.28,2.29] | 7:DPN7.(HD2 HB2)       |
| > distance | 1.000e+000 | [2.33,2.34] | 7:DPN7.(HD2 HB3)       |
| > distance | 1.000e+000 | [3.25,3.26] | 7:ARG8.H 7:DPN7.H      |
| > distance | 1.000e+000 | [2.28,2.29] | 7:ARG8.H 7:DPN7.HA     |
| > distance | 5.000e-001 | [3.03,3.04] | 7:ARG8.H 7:DPN7.HB2    |
| > distance | 5.000e-001 | [3.23,3.24] | 7:ARG8.H 7:DPN7.HB3    |
| > distance | 1.000e+000 | [2.66,2.67] | 7:ARG8.(HA H)          |
| > distance | 1.000e+000 | [2.55,2.56] | 7:ARG8.(HB2 H)         |
| > distance | 1.000e+000 | [2.37,2.38] | 7:ARG8.(HB3 HA)        |
| > distance | 5.000e-001 | [2.98,2.99] | 7:ARG8.(HG2 H)         |
| > distance | 1.000e+000 | [2.29,2.3]  | 7:ARG8.(HG2 HB2)       |
| > distance | 1.000e+000 | [2.74,2.75] | 7:ARG8.HG3 7:DPN7.HB3  |
| > distance | 5.000e-001 | [2.91,2.92] | 7:ARG8.(HG3 H)         |
| > distance | 1.000e+000 | [2.29,2.3]  | 7:ARG8.(HG3 HB2)       |
| > distance | 5.000e-001 | [3.05,3.06] | 7:ARG8.(HD2 HG2)       |
| > distance | 1.000e+000 | [2.79,2.8]  | 7:ARG8.(HD2 HG3)       |
| > distance | 1.000e+000 | [2.72,2.73] | 7:ARG8.(HD3 HG3)       |
| > distance | 1.000e+000 | [2.34,2.35] | 7:ARG8.HH22 7:ALA5.HB2 |
| > distance | 1.000e+000 | [2.56,2.57] | 7:ARG8.HH22 7:ALA5.HB3 |
| > distance | 3.000e+000 | [2.18,2.19] | 7:TRP9.H 7:ARG8.HB3    |

```

> distance 1.000e+000 [2.42,2.43] 7:TRP9.(HA H)
> distance 1.000e+000 [2.62,2.63] 7:TRP9.(HB2 H)
> distance 1.000e+000 [2.57,2.58] 7:TRP9.(HB2 HA)
> distance 1.000e+000 [2.67,2.68] 7:TRP9.(HB3 H)
> distance 1.000e+000 [2.36,2.37] 7:TRP9.(HB3 HA)
> distance 1.000e+000 [3.85,3.84] 7:TRP9.HD1 7:ARG8.H
> distance 5.000e-001 [3.74,3.75] 7:TRP9.(HD1 H)
> distance 5.000e-001 [3.43,3.44] 7:TRP9.(HD1 HA)
> distance 5.000e-001 [4.02,4.03] 7:TRP9.(HE3 H)
> distance 5.000e-001 [2.91,2.92] 7:TRP9.(HE3 HB2)
> distance 5.000e-001 [3.06,3.07] 7:TRP9.(HE3 HB3)
> distance 5.000e-001 [2.78,2.79] 7:ALA10.HB2 7:ALA5.H
> distance 5.000e-001 [3.01,3.02] 7:ALA10.HB3 7:ALA5.H
> distance 1.000e+000 [2.97,2.98] 7:ALA10.H 7:ALA5.H
> distance 1.000e+000 [2.47,2.48] 7:ALA10.H 7:TRP9.HA
> distance 1.000e+000 [2.67,2.68] 7:ALA10.(H HA)
> distance 1.000e+000 [2.67,2.68] 7:ALA10.(H HB2)
> distance 1.000e+000 [2.8,2.81] 7:ALA10.(H HB3)
> distance 1.000e+000 [2.53,2.54] 7:MET11.(HG3 HB2)
> distance 1.000e+000 [2.43,2.44] 7:MET11.H 7:ALA10.HA
> distance 1.000e+000 [2.66,2.67] 7:MET11.H 7:ALA10.H
> distance 1.000e+000 [2.99,3] 7:MET11.(H HA)
> distance 1.000e+000 [2.81,2.82] 7:MET11.(H HB3)

```



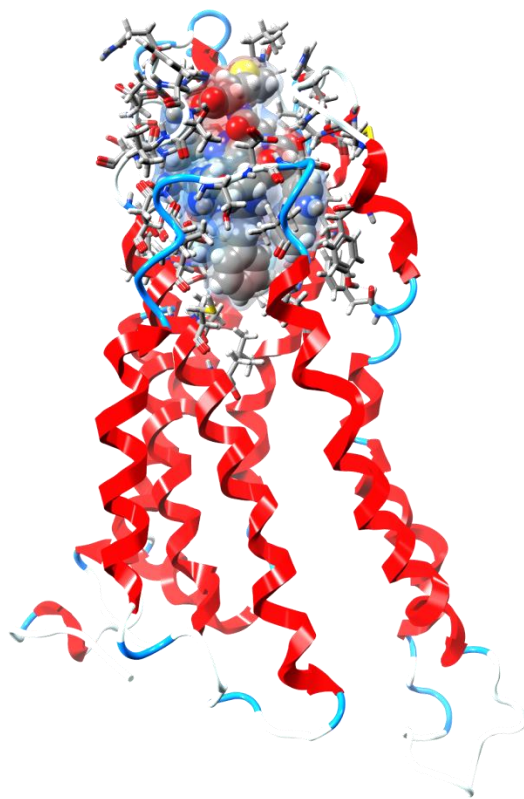

**Figure S24.** Compound **1** in its NOE restrained conformation bound to MC4R in its active conformation. The ligand is shown with its solvent accessible surface. The extracellular face of the receptor-ligand complex is at the top of the figure with the intracellular face at the bottom.

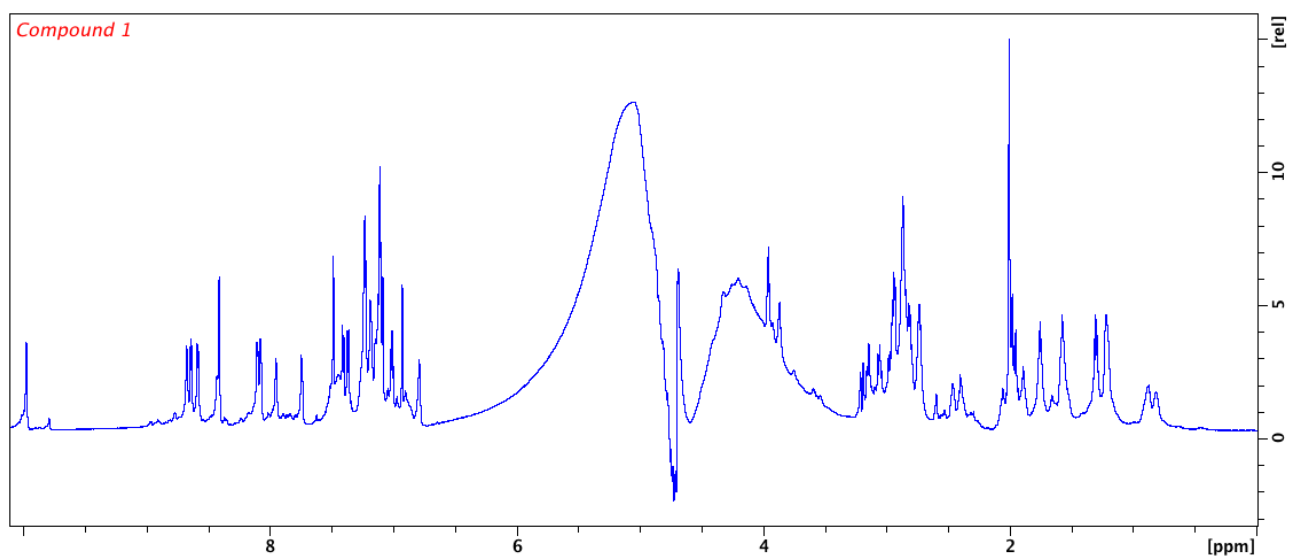

**Figure S25:** 1D  $^1\text{H}$ -NMR spectrum of compound **1** (800 MHz in  $\text{H}_2\text{O}$  /  $\text{D}_2\text{O}$  /  $\text{HOAc}_{\text{d}_3}$  - 88:10:2 recorded with water suppression).



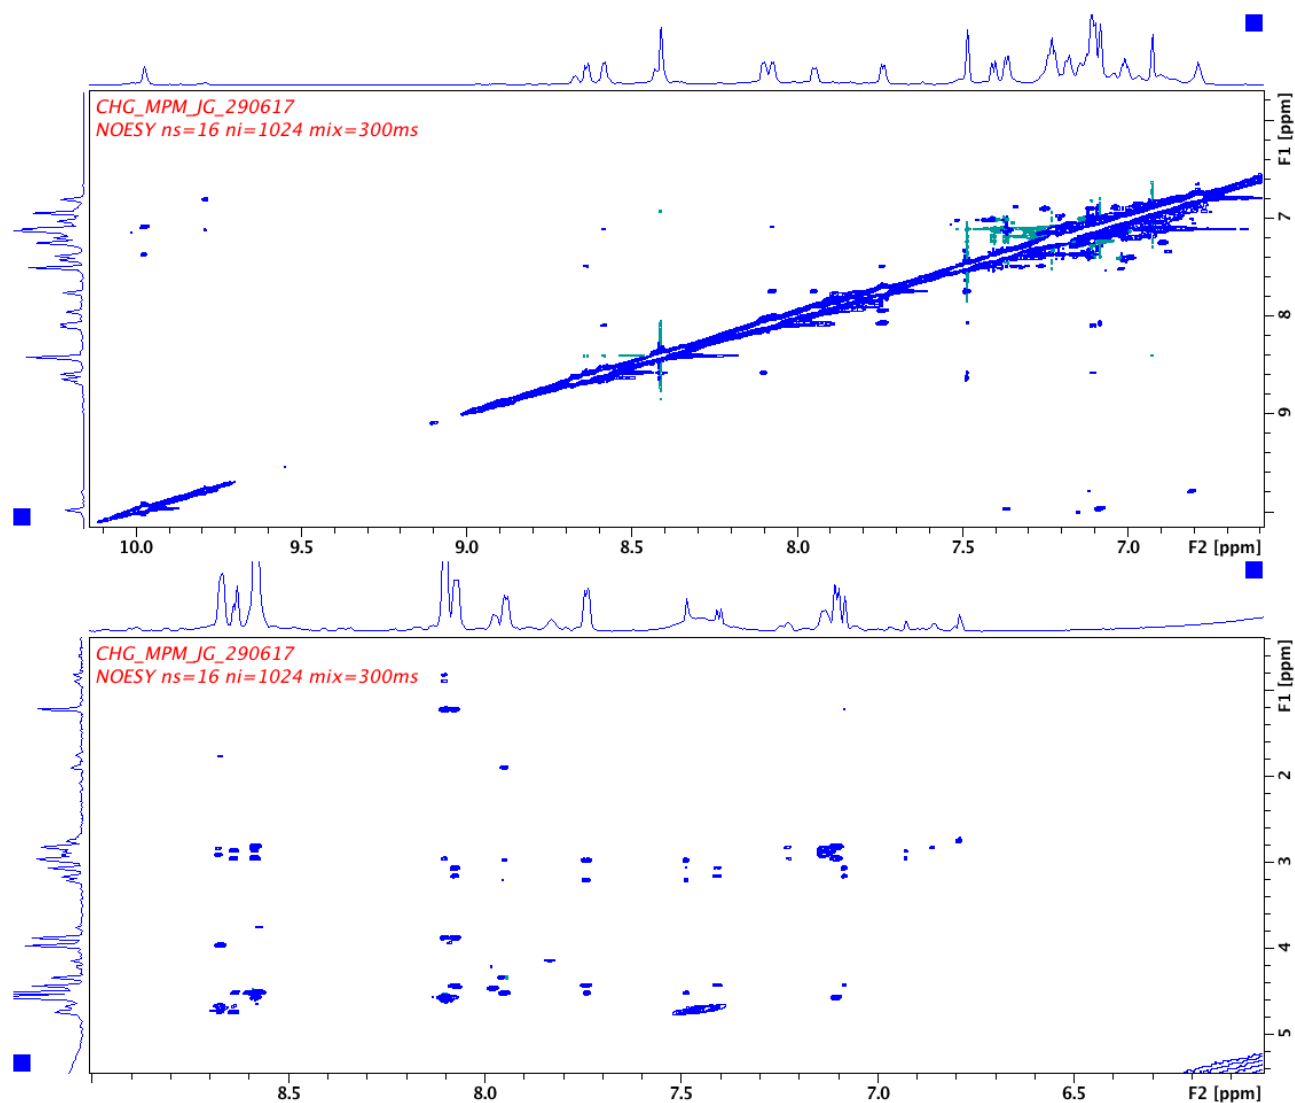

**Figure S26.** The NH-NH, NH-H<sup>a/b</sup>, and the aliphatic region of the recorded NOESY spectrum (800 MHz, 300 ms mixing time) used in the structural analysis of compound **1**.

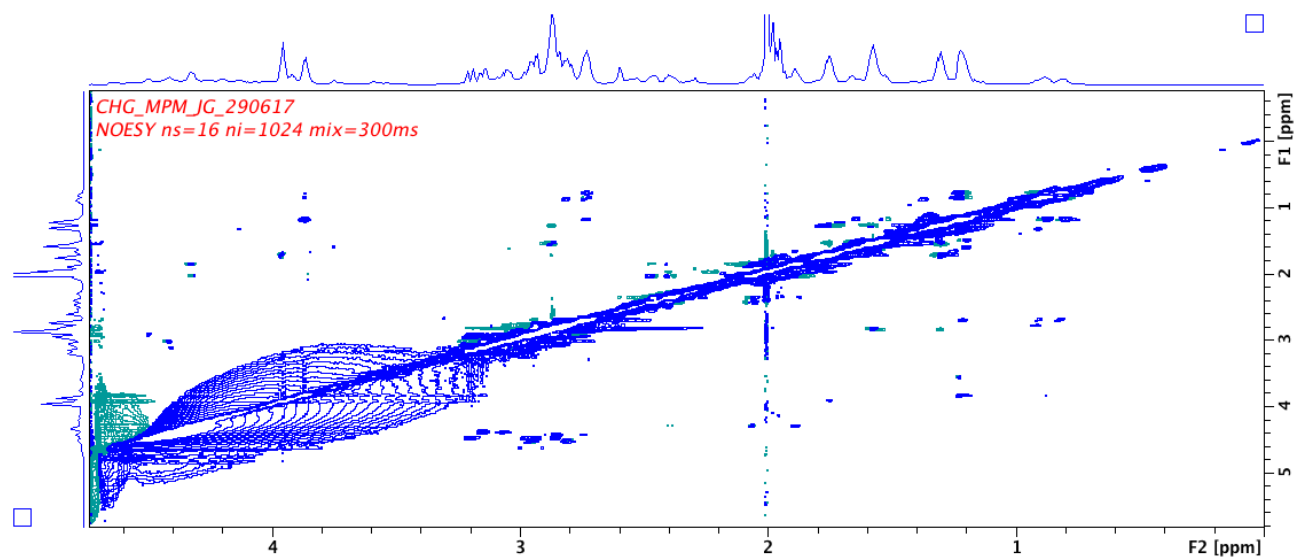

**Figure S27.** The H<sup>a</sup>-H<sup>b</sup> and the aliphatic region of the recorded NOESY spectrum (800 MHz, 300 ms mixing time) used in the structural analysis of compound **1**.

a

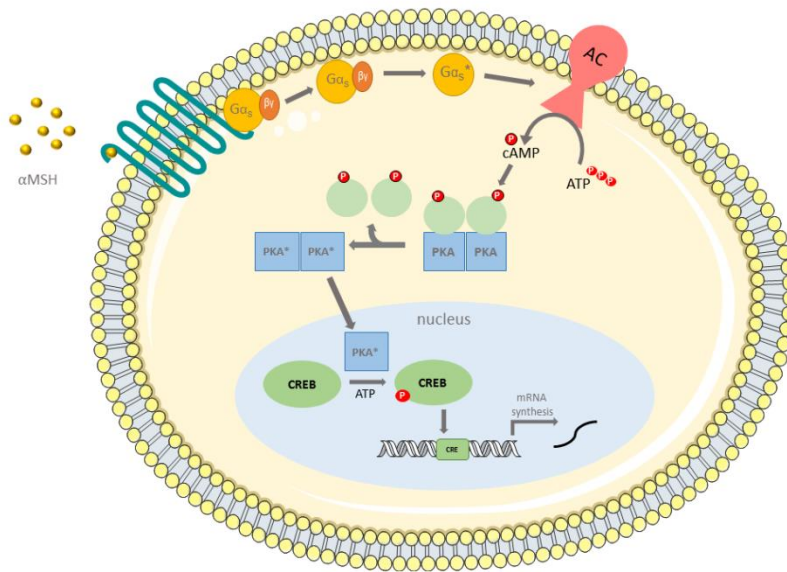

b

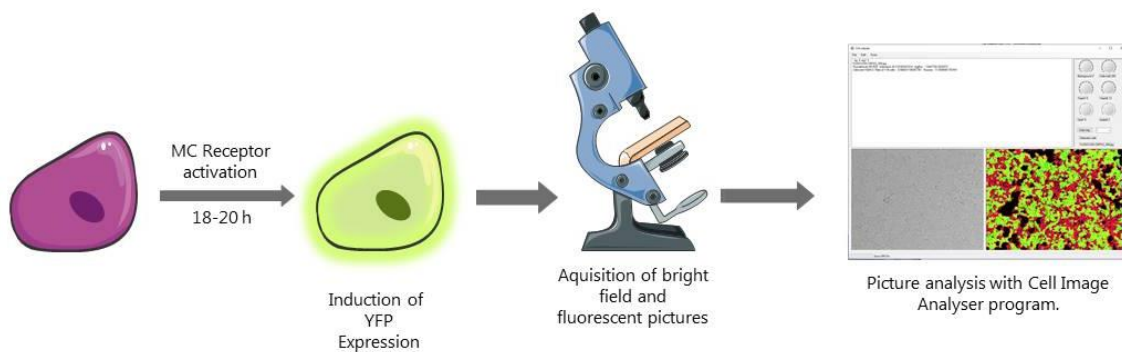

**Figure S28.** Overview of the cAMP-mediated transcriptional reporter assay system. a. Schematic for canonical cAMP signaling cascade as a mechanism for Melanocortin-mediated regulation of gene expression.  $\alpha$ -MSH stimulation of melanocortin receptors (MCRs) leads to activation of the  $\alpha$ -subunit of the stimulatory heterotrimeric G-protein,  $G_{\alpha s}$ , and the subsequent activation of adenylyl cyclase (AC) enzymes, which convert ATP in cAMP. cAMP-mediated activation of protein kinase A (PKA) leads to the dissociation of the catalytic subunit of the PKA complex. Upon translocation of the active PKA catalytic subunit into the nucleus, PKA can phosphorylate the transcription factor CREB (cAMP-Response Element Binding Protein; CREB-P denoting the phosphorylated variant). CREB-P, when bound to DNA with defined consensus sequences called cAMP Response Elements (CREs) upstream of genes can enhance the transcription of these genes via facilitation of the function of the core transcriptional machinery. b. Schematic representation of CRE reporter assay. Stimulation of cells expressing MCRs over 18-20 hours results in an increase in EYFP expression. This is visualized microscopically and analyzed with custom-designed data acquisition software.

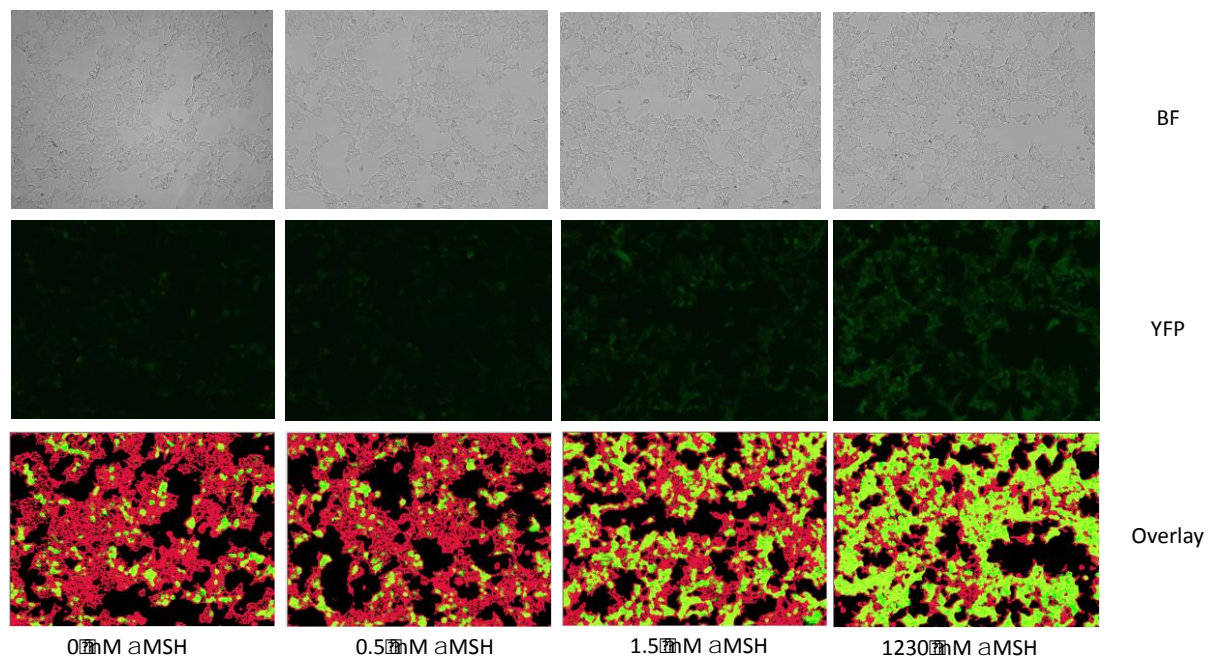

**Figure S29.** Comparison of bright field, fluorescence images and overlaid analysis results from the CIA program, for a CRE transcriptional reporter gene assay for MC4R expressing cells stimulated with  $\alpha$ -MSH. Bright field (BF), and fluorescence images (YFP; filter cube: ex: 500/20 nm, em: 530/30 nm) are shown with the image analysis result (Overlay) for a range encompassing 0-1200 nM concentrations of  $\alpha$ -MSH.

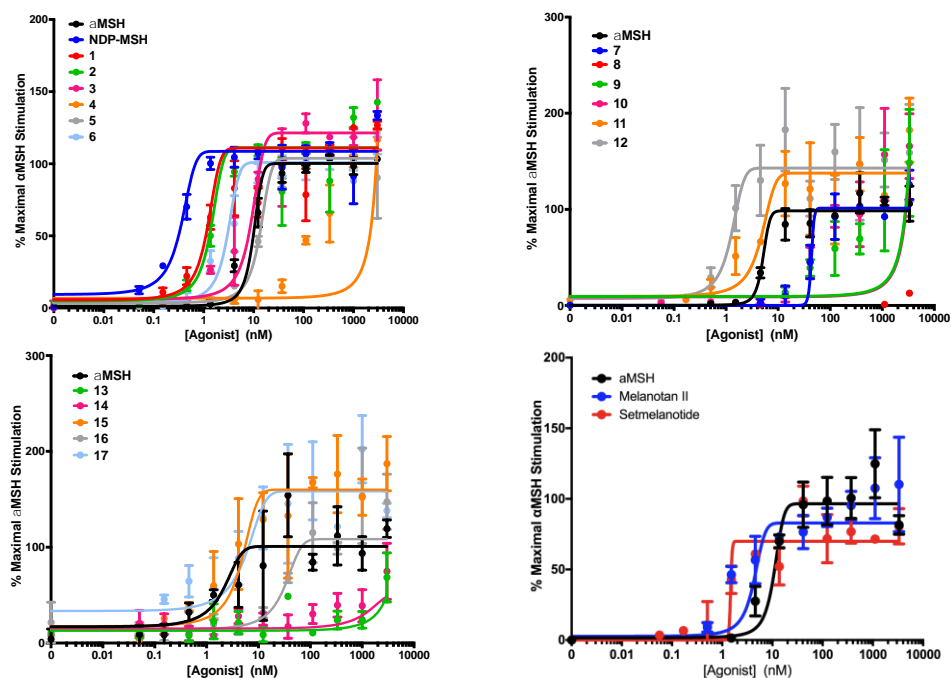

**Figure S30.** Concentration response curves for single vector reporter gene assay. Depicted are representative tracings for the indicated compounds from individual experiments using MC4R expressing cells. Data are displayed as the average of normalized, background-corrected responses  $\pm$  standard error of the mean. Curves have been generated and fitted using GraphPad Prism 7.0 analytical software.

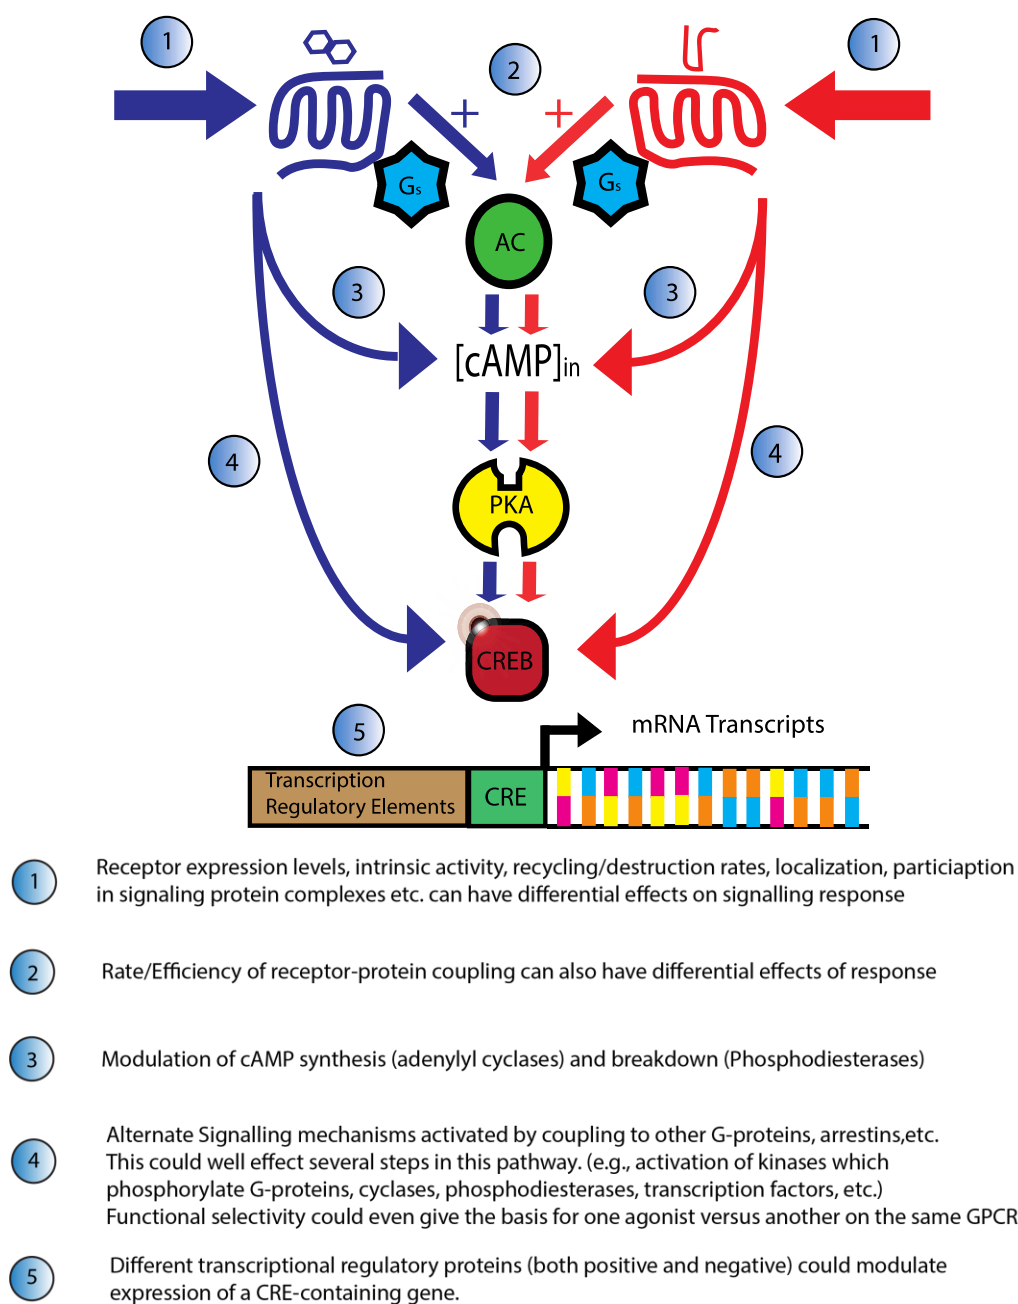

**Figure S31.** Overview of variations and redundancies in G<sub>s</sub>-mediated modulation of CRE-regulated gene expression. Displayed, and expanded upon in the legend, are points of convergence, as well as places where divergence can occur, between two different GPCRs (one displayed as blue with a small molecule ligand, and a red receptor with a hypothetical peptide ligand) that utilize cAMP signaling. The net effect on a given gene's expression following the activation of different G<sub>s</sub>-coupled receptors is the integration of the extent of specific signalling pathways activated as well as the timing of their activation.
